# 1 The transcription factor reservoir and chromatin landscape in activated 2 plasmacytoid dendritic cells

3

4 Ritu Mann-Nüttel,<sup>1</sup> Shafaqat Ali,<sup>1,2,3</sup> Patrick Petzsch,<sup>4</sup> Karl Köhrer,<sup>4</sup> Judith Alferink,<sup>2,3</sup> and Stefanie  
5 Scheu<sup>1,5,\*</sup>

6 <sup>1</sup>Institute of Medical Microbiology and Hospital Hygiene, University of Düsseldorf, Düsseldorf, Germany

7 <sup>2</sup>Cells in Motion Interfaculty Centre, Münster, Germany

8 <sup>3</sup>Department of Mental Health, University of Münster, Münster, Germany

9 <sup>4</sup>Biological and Medical Research Center (BMFZ), Medical Faculty, University of Düsseldorf,  
10 Düsseldorf, Germany

11 <sup>5</sup>Lead contact

12 \*Correspondence: stefanie.scheu@hhu.de

13

14 **Running title:** Transcription factors in pDC activation

15

## 16 **Abstract**

17 Transcription factors (TFs) control gene expression by direct binding to regulatory regions of target  
18 genes but also by impacting chromatin landscapes and thereby modulating DNA accessibility for other  
19 TFs. To date, the global TF reservoir in plasmacytoid dendritic cells (pDCs), a cell type with the unique  
20 capacity to produce unmatched amounts of type I interferons, has not been fully characterized. To fill  
21 this gap, we have performed a comprehensive analysis in naïve and TLR9-activated pDCs in a time  
22 course study covering early timepoints after stimulation (2h, 6h, 12h) integrating gene expression (RNA-  
23 Seq), chromatin landscape (ATAC-Seq) and Gene Ontology studies. We found that 70% of all described  
24 TFs are expressed in pDCs for at least one stimulation time point and that activation predominantly  
25 “turned on” the chromatin regions associated with TF genes. We hereby define the complete set of  
26 TLR9-regulated TFs in pDCs. Further, this study identifies the AP-1 family of TFs as potentially  
27 important but so far less well characterized regulators of pDC function.

28

## 29 **Keywords**

30 Transcription factors, plasmacytoid dendritic cells, TLR9, gene expression analysis, next generation  
31 sequencing, ATAC-Seq

32

## 33 **Introduction**

34 Transcription factors (TFs) are known to bind to DNA-regulatory sequences to either enhance or inhibit  
35 gene transcription during cell differentiation, at steady state, and for exertion of cell effector functions  
36 (Vaquerizas et al., 2009; Wingender et al., 2018; Zhou et al., 2017). TFs also show unique expression  
37 patterns for different cell types and cellular states. The differentiation of distinct cell types from  
38 pluripotent stem cells is enabled by the expression of cell fate-determining TFs in progenitor cells.  
39 Transcription factors not only regulate cell development and effector functions by binding to *cis-*

40 regulatory elements but also impact the accessibility of chromatin in different cell states (Serebreni and  
41 Stark, 2020). These latter TFs are called pioneering TFs and have the ability to remodel chromatin and  
42 thus modify the epigenome (Drouin, 2014). Chromatin is dynamically modified during cell differentiation  
43 leading to a cell-type specific landscape (Chauvistre and Sere, 2020; Deaton and Bird, 2011), which  
44 may be altered after cell activation. This process changes DNA accessibility for a particular set of TFs,  
45 that in turn modulate the expression of other genes important for cell identity and function. Efforts have  
46 been made to list and integrate all known mouse TFs in dedicated databases (db), such as Riken mouse  
47 TFdb (Kanamori et al., 2004) and TFCat (Fulton et al., 2009), amongst others. However, most of these  
48 were built before 2010 and have not been updated. The AnimalTFDB, most recently updated in 2019,  
49 classifies the mouse TF reservoir based on the structure of the DNA binding domains (Hu et al., 2019;  
50 Zhang et al., 2012). This database provides an accurate TF family assignment combined with TF  
51 binding site information in 22 animal species which also allows insight into TF evolution.

52 Plasmacytoid dendritic cells (pDCs) comprise a rare population of 0.2 to 0.8% of peripheral blood  
53 mononuclear cells (Liu, 2005). They were first described more than 40 years ago as natural interferon  
54 (IFN)-producing cells (IPCS) that activate NK cells after virus recognition (Trinchieri and Santoli, 1978).  
55 As we and others have shown, pDCs are now known for their capacity to produce unmatched amounts  
56 of type I IFN in response to stimulation of their toll like receptors (TLRs) (Ali et al., 2019; Asselin-Paturel  
57 et al., 2001; Bauer et al., 2016; Gilliet et al., 2008; Reizis, 2019). In contrast to other dendritic cell (DC)  
58 subsets, pDCs express only a limited repertoire of TLRs, namely predominantly TLR7 and TLR9  
59 (Hornung et al., 2002), which recognize guanosine- and uridine-rich ssRNA and DNA containing CpG  
60 motifs (Diebold et al., 2004; Ishii and Akira, 2006; Wu et al., 2019). After TLR7 and TLR9 activation, in  
61 addition to type I IFN production, pDCs acquire the ability to prime T cell responses (Salio et al., 2004).  
62 CpG can be considered as an optimal and specific microbial stimulus for pDCs which induces TLR9  
63 mediated signaling that leads to activation of IRF7 and NF- $\kappa$ B signaling pathways (Swiecki and  
64 Colonna, 2015). With regard to immunopathologies, unremitting production of type I IFN by pDCs has  
65 been reported in autoimmune diseases like systemic lupus erythematosus (Elkon and Wiedeman,  
66 2012). Moreover, when recruited to the tumor microenvironment pDCs may induce immune tolerance  
67 and thus contribute to tumor progression (Le Mercier et al., 2013; Li et al., 2017). Thus, exploiting CpG  
68 for immunotherapeutic treatment to both enhance and repress pDC responses to mediate antitumor  
69 activity (Lou et al., 2011), treat allergy (Hayashi et al., 2004), and autoimmunity (Christensen et al.,  
70 2006) has been attempted in recent years. In addition, targeting specific TFs with the aim to control  
71 immunity and autoimmune disease (Lee et al., 2018) or to enhance cancer gene therapy (Liebermann  
72 and Zerbini, 2006) has become the focus of attention in recent decades to develop immunomodulatory  
73 drugs.

74 Over the last years, different TFs have been determined as cell fate-instructive TFs in DCs. In particular,  
75 absence of the interferon regulatory factor 8 (IRF8) resulted in pDC-deficient mice (Tamura et al., 2005;  
76 Tsujimura et al., 2002). Bornstein *et al.* further identified IRF8 as an inducer of cell-specific chromatin  
77 changes in thousands of pDC enhancers (Bornstein et al., 2014). Further, mice deficient in the Ets  
78 family transcription factor Spi-B showed decreased pDC numbers in the bone marrow (BM) while pDC  
79 numbers were increased in the periphery. This indicated an involvement of Spi-B in pDC development,

80 caused by a defective retainment of mature nondividing pDCs in the BM (Sasaki et al., 2012). In contrast  
81 to the phenotype of *Spi-B*-deficient mice, *Runx2*-deficient animals exhibited normal pDC development  
82 in the BM but reduced pDC numbers in the periphery due to a reduced egress of mature pDCs from the  
83 BM into the circulation (Chopin et al., 2016; Sawai et al., 2013). Finally, the *Tcf4*-encoded TF E2-2 is  
84 essentially required for pDC development as either its constitutive or inducible deletion in mice blocked  
85 pDC differentiation (Cisse et al., 2008). Using a combined approach to evaluate genome-wide  
86 expression and epigenetic marks a regulatory circuitry for pDC commitment within the overall DC subset  
87 specification has been devised (Lin et al., 2015). Even though the functions of selected cell fate TFs  
88 have been well described in pDCs, to our knowledge no global TF expression analysis after pDC  
89 activation has been performed for this cell type.

90 In the present study, we performed a detailed analysis on the changes in expression and chromatin  
91 accessibility for the complete set of all known TFs in pDCs in an early time course after activation. To  
92 this purpose, we used the AnimalTFDB data base and combined RNA-Seq, ATAC-Seq, and Gene  
93 Ontology analyses to define global TF gene expression, chromatin landscapes, and biological pathways  
94 in pDCs following activation. We defined epigenetic and transcriptional states using purified murine BM-  
95 derived Flt3-L cultured pDCs 2h, 6h, and 12h after TLR9 activation as compared to steady state. Based  
96 on our findings, we suggest a novel set of CpG-dependent TFs associated with pDC activation. We  
97 further identify the AP-1 family of TFs, which are so far less well characterized in pDC biology, as novel  
98 and possibly important players in these cells after activation.

99

## 100 **Results**

101

### 102 **Expression of transcription factors in naïve and activated pDCs**

103 To assess the impact of pDC activation on global TF expression in these cells, we simulated early  
104 events after virus infection in a time course study. To this end, we performed RNA-Seq of sorted BM-  
105 derived Flt3-L pDCs from C57BL/6N mice that were either left untreated or stimulated with CpG for 2h,  
106 6h, or 12h. This synthetic double-strand DNA specifically activates endosomal TLR9 and is known to  
107 induce a robust type I IFN production (Gilliet et al., 2008). As the global definition of the mouse TF  
108 reservoir in this study we used 1,636 genes annotated by Hu *et al.* as TFs in the mouse genome (Hu  
109 et al., 2019). We evaluated the expression of all TFs in pDCs according to a formula by Chen *et al.*,  
110 which takes into consideration the library length of the RNA-Seq run and the gene length to determine  
111 whether the gene is expressed or not (Chen et al., 2016). We found that 1,014 TFs (70% of all annotated  
112 TFs) are expressed in at least one condition, naïve or after TLR9 activation (2h, 6h, 12h) (**Fig. 1A**). The  
113 TFs expressed in pDCs were allocated to the different TF classes based on their DNA binding domain  
114 as described in the AnimalTFDB (Hu et al., 2019) (**Fig. 1B**). We found that more than half of all TFs  
115 (55%, 558 TFs in total) expressed in pDCs belong to the Zinc-coordinating TF group which use zinc  
116 ions to stabilize its folding and classically consist of two-stranded  $\beta$ -sheets and a short  $\alpha$ -helix. Helix-  
117 turn-helix factors, of which 158 (16%) were expressed in pDCs under the defined conditions, comprise  
118 several helices mediating multiple functions such as insertion into a major DNA groove, stabilization of  
119 the backbone and binding to the overall structure of the DNA (Aravind et al., 2005). Furthermore, 10%

120 (104 TFs) of all TFs expressed in pDCs belong to the Basic Domain group, which contains TFs that  
121 become  $\alpha$ -helically folded upon DNA binding (Patel et al., 1990; Weiss et al., 1990). 44 expressed TFs  
122 (4%) belong to the Other  $\alpha$ -Helix group exhibiting  $\alpha$ -helically structured interfaces are required for DNA  
123 binding. In addition, 32 of the TFs (3%) found in pDCs are  $\beta$ -Scaffold factors which use a large  $\beta$ -sheet  
124 surface to recognize DNA by binding in the minor groove. Lastly, another ~100 TFs (12%) were of  
125 unclassified structure, meaning their mode of action for DNA binding is unknown. Strikingly, some TF  
126 families were not expressed in pDCs at all (**Fig. 1C**), such as the AP-2 family in the Basic Domain  
127 group, the GCM family in the  $\beta$ -Scaffold group, the Orthodenticle homeobox (Otx) TFs in the Helix-turn-  
128 helix group, Steroidgenic factor (SF)-like factors in the Zinc-coordinating group, and the DM group, first  
129 discovered in *Drosophila melanogaster*, among the unclassified TFs. Other TF families showed  
130 expression of all family members in at least one condition (steady state, or CpG 2h, 6h, 12h), such as  
131 the Transforming growth factor- $\beta$  stimulated clone-22 (TSC22) family in the Basic Domain group, Runt  
132 and Signal Transducers and Activators of Transcription (STAT) factors from the  $\beta$ -scaffold classification,  
133 and E2F and Serum response factor (SRF) factors in the Helix-turn-helix group. In summary, 70% of all  
134 genes annotated as TFs in the mouse genome (1,014 out of 1,636) were expressed either in naïve or  
135 activated pDCs (CpG 2h, 6h, 12h), covering a wide range of TF classes based on different DNA binding  
136 mechanisms.

137

### 138 **Activation-dependent TF expression changes**

139 We next investigated the impact of pDC activation on changes in expression of TFs using our time  
140 course RNA-Seq study. The similarity of our biological replicates in each condition was evaluated with  
141 a Pearson correlation analysis. Our results revealed high similarity (<95%) for the biological replicates  
142 used in the respective conditions of the RNA-Seq data set. Notably, the differences in the Pearson  
143 correlation coefficient between the naïve and first stimulation time point (CpG 2h) were higher than the  
144 differences observed between the later CpG stimulation time points (6h, 12h) (**Fig. 2A**). We used the  
145 data for differential expression analysis of genes between pDC states, not only comparing TF  
146 expression levels between different CpG stimulation time points vs steady state but also between the  
147 different CpG stimulation time points between each other (**Fig. 2B**). The total number of differentially  
148 expressed TFs (DETFs) with a fold change  $|FC|>2$  and a  $p<0.05$  between stimulated vs naïve pDCs  
149 (452 DETFs in 2h vs 0h; 400 DETFs in 6h vs 0h; 335 DETFs in 12h vs 0h) was higher than the absolute  
150 number of TFs showing expression changes between the CpG conditions (270 DETFs in 6h vs 2h; 119  
151 DETFs in 12h vs 6h; 358 DETFs in 12h vs 2h). This reflects the results from the Pearson correlation  
152 analysis (**Fig. 2A**). Interestingly, by comparing TF gene expression in 2h stimulated vs unstimulated  
153 pDCs, a higher number of TF genes were down-regulated in expression after TLR9 stimulation than  
154 were upregulated in these cells (271 vs 181). With increased duration of pDC stimulation, the difference  
155 in the number of TFs that were up- vs down-regulated diminished (208 down vs 192 up in 6h vs 0h).  
156 Finally, at the longest stimulation time used in this study (12h vs 0h), the number of up-regulated TF  
157 genes was higher than the number of down-regulated TF genes (179 vs 156). Comparing the CpG  
158 stimulated samples amongst each other, more TFs exhibited increased expression with longer  
159 stimulation times than there were TFs showing reduced expression levels (171 up vs 99 down in 6h vs



160 2h; 63 up vs 56 down in 12h vs 6h; 234 up vs 124 down in 12h vs 2h) (**Fig. 2B** and **C**). In total, we  
161 identified 661 unique TF genes that are differentially expressed between at least one of the compared  
162 pDC states  $|FC|>2$ ,  $p<0.05$ , pDC at steady state, or after CpG activation at 2h, 6h, 12h). To evaluate  
163 patterns of expression changes for all 661 differentially expressed TFs, we next carried out hierarchical  
164 clustering of all TF genes based on the normalized expression in naïve and stimulated pDCs (**Fig. 2B**).  
165 This led to the definition of five different clusters of TFs according to their expression pattern (**Fig. 2D**).  
166 Cluster I, IV and V contained TFs with large expression changes after short duration of pDC stimulation  
167 (2h), while cluster II and III contained TFs that exhibit altered expression only with longer duration of  
168 cell stimulation (6h, 12h). Cluster V contained genes that were all down-regulated at any time point after  
169 CpG stimulation as compared to the unstimulated condition (**Fig. 2D**). In more detail, TFs driving either  
170 pDC (e.g. *Tcf4*, *Spib*, *Runx2*) or classical DC (cDC) (e.g. *Nfil3*, *Spi1*, *Id2*) development (Bornstein et al.,  
171 2014; Sasaki et al., 2012; Sawai et al., 2013; Tamura et al., 2005; Tsujimura et al., 2002) were  
172 distributed over all clusters I to V. This highlights variable expression patterns of DC cell fate TFs after  
173 pDC activation. In summary, in this time course study that models early events after virus infection, we  
174 identified in total 661 unique CpG-dependent TF genes that show significant differential expression in  
175 at least one condition compared to another  $|FC|>2$ ,  $p<0.05$ , pDC at steady state, or after CpG activation  
176 at 2h, 6h, 12h). Further, pDC activation showed time dependent activating as well as inhibiting effects  
177 on the expression of TFs.

178

### 179 **Gene ontology analysis of CpG-dependent TFs**

180 Next, downstream gene ontology (GO) analyses of RNA-Seq data were performed to unravel the  
181 biological processes in which CpG-dependent TFs are involved. For this purpose, functional annotation  
182 clustering with the 661 TF encoding genes defined as CpG-dependent  $|FC|>2$ ,  $p<0.05$ ) was performed  
183 on DAVID including terms for biological processes (BP), molecular functions (MF), and cellular  
184 components (CC). The analysis produced 16 clusters, out of which the 9 non-redundant and most  
185 relevant in the context of innate immunity are depicted in **Fig. 3A** (complete list in **Table S1**). The GO  
186 analyses produced an individual fold enrichment for each GO term (**Fig. 3A**, right column), and in  
187 addition, an enrichment score for each cluster containing several GO terms (**Table S1**). The order of  
188 the clusters from top to bottom follows a decrease in the cluster enrichment score, establishing a  
189 hierarchy of importance for the biological processes affected. Cluster one contained GO terms for DNA  
190 binding, transcription, and nuclear localization with a ~5 fold enrichment comprising more than 400  
191 genes in each term. This confirmed the inherent DNA binding capacity of the defined murine TF  
192 reservoir by Hu et al. (Hu et al., 2019) and proved the applicability of our approach. The following  
193 clusters comprised less than 25 unique genes per GO term but significant fold enrichments for most  
194 GO terms drawing attention to specific TFs involved in particular biological processes in pDC activation.  
195 Cluster 2 contained GO terms associated with the circadian rhythm and regulation of gene expression  
196 (e.g. *Klf10*, *Jun*). We further found GO terms enriched for the I $\kappa$ B/NF $\kappa$ B complex, NIK/NF $\kappa$ B signaling,  
197 and I $\kappa$ B kinase/NF $\kappa$ B signaling (e.g. *Nfkb1*, *Nfkb2*, *Rel*), which showed the highest fold enrichment (up  
198 to 25 fold) among all GO terms and clusters. In line with this, it is well known that CpG activates the  
199 canonical TLR9-Myd88-NF $\kappa$ B/IRF7 signaling pathway in pDCs (Tomasello et al., 2018). Another cluster

200 contained processes involving SMAD proteins (e.g. *Smad1*, *Smad2*, *Smad3*), signal transducers for  
201 TGF $\beta$  receptors, involved in receptor binding, signal transduction, and protein complex assembly. Of  
202 note, it is known that pDCs exposed to TGF $\beta$  lose their ability to produce type I IFN after TLR9  
203 stimulation (Saas and Perruche, 2012). Another significantly enriched cluster comprised GO terms for  
204 various processes involving the endoplasmic reticulum (e.g. *Cebpb*, *Ddit3*), an important site of  
205 intracellular protein and lipid assembly. GO terms containing TFs that regulate sumoylation (e.g. *Pias4*,  
206 *Egr2*), posttranslational modifications that e.g. coordinate the repression of inflammatory gene  
207 expression during innate sensing (Decque et al., 2016), were also significantly enriched and clustered  
208 together. As expected, CpG-dependent TFs were enriched in GO terms for the JAK-STAT signaling  
209 pathway (e.g. *Stat1*, *Stat2*, *Stat3*) activated by binding of type I IFN to the type I IFN receptor. TFs  
210 affecting mRNA binding processes (e.g. *Mbd2*, *Ybx2*) which are required for synthesizing proteins at  
211 the ribosomes, were also affected. The fact that epigenetic modulators (e.g. *Prdm9*, *Kmt2c*) were  
212 enriched, highlights the importance of gene expression regulation of TFs in pDCs by modifications that  
213 alter the physical structure of the DNA after CpG stimulation. In summary, we find that CpG-dependent  
214 TFs are involved in a wide variety of biological processes, such as circadian regulation, mRNA binding,  
215 and signaling pathways such as the NF $\kappa$ B and JAK-STAT pathways. The analyses revealed the  
216 importance of these biological processes being affected by pDC activation in a hierarchical manner  
217 according to their attributed relevance. This opens up the opportunity to investigate specific TFs  
218 involved in processes that have not been fully elucidated for pDC biology.

219

#### 220 **pDC activation modulates chromatin accessibility for binding of TF families**

221 Another hallmark of cell activation is the modification of the chromatin landscape. To better understand  
222 how the chromatin accessibility of different TF families is altered in pDCs in the course of activation, we  
223 performed ATAC-Seq in naïve and 2h CpG activated pDCs. Pearson correlation analysis for the ATAC-  
224 Seq data reveals >95% similarity for all biological replicates (**Fig. 4A**). A quantitative analysis of peak  
225 intensities across sample conditions and a differential analysis to determine the number and regions of  
226 activation-dependent accessible chromatin peaks was performed. Comparing the specific genomic  
227 locations such as introns, 3'-UTRs, distal (1-3kb) and proximal (0-1kb) promoter regions with accessible  
228 chromatin between naïve and 2h CpG stimulated pDCs, we found that chromatin is mostly open in distal  
229 intergenic and intron regions in both conditions. However, there was no apparent shift in the distribution  
230 of genomic locations where chromatin is accessible in pDCs after cell activation (**Fig. 4B**). This suggests  
231 that TLR9 activation regulates the chromatin accessibility globally in pDCs but does not induce shifts in  
232 the chromatin landscape per se. Overall, we detected ~116,000 accessible regions (peaks) across  
233 samples in naïve and activated states. Next, we performed a differential analysis using the DESeq2  
234 algorithm to quantify the number of CpG-dependent accessible peaks. pDC activation substantially  
235 altered the chromatin landscape leading to ~16,600 altered accessible regions ( $|FC|>2$ ,  $p<0.05$ , **Fig.4C**,  
236 **D**). In detail, 2h CpG stimulation of pDCs resulted in 13,226 peaks with increased accessibility and  
237 3,381 peaks with decreased accessibility (**Fig. 4C, D**). Roughly 80% of all CpG-dependent chromatin  
238 regions in 2h stimulated pDCs exhibited increased DNA accessibility as compared to naïve pDCs. This  
239 suggests that more of the pDC chromatin landscape is „turned on“ rather than being „turned off“ after

240 pDC activation. To unravel the biological significance of the activation-dependent chromatin states for  
241 the more accessible vs the less accessible DNA regions in pDCs, a differential motif analysis using the  
242 HOCOMOCO database (Kulakovskiy et al., 2018) was performed (**Fig. 4E**). The purpose of the analysis  
243 was to identify TF families that gain or lose access to DNA after pDC activation which would hint at  
244 pathways being affected after activation. At the same time, this unbiased approach allows the  
245 identification of TFs that have not been associated with this cell type before. This motif analysis revealed  
246 that TFs belonging to the JAK-STAT and the NF $\kappa$ B signaling pathway have increased accessibility to  
247 their specific DNA binding regions after CpG stimulation. Besides the NF $\kappa$ B family, we identified the  
248 AP-1 family of TFs as one of the most significant hits to gain access to the DNA in our search. This type  
249 of TF remains so far less well characterized in pDCs after pathogen encounter or in pDC-specific  
250 functions in chronic inflammatory or autoimmune disorders. Albeit the AP-1 member c-Fos has been  
251 shown to be required for type I IFN induction, a hallmark function of pDCs, in osteoclast precursor cells  
252 after RANKL treatment (Takayanagi et al., 2002). On the other hand, Ets family members belonging to  
253 the Helix-turn-helix family of TFs and Zinc-coordinating zf-C2H2 TFs had less access to DNA. Strikingly,  
254 pDC-driving cell fate TFs such as IRF8 and RUNX2 showed motif enrichment in two sets of regions,  
255 one set with increased and another set with decreased chromatin accessibility after pDC activation.  
256 Hence, pDC-driving cell fate TFs both gained and lost access to specific DNA regions after TLR9  
257 activation. We next performed a more detailed analysis searching for enrichment of TF motifs among  
258 all regions that contain the promoter sequence of one or more genes. As TFs can regulate gene  
259 expression by binding to the promoter site of genes this analysis hints at TF families that exert a  
260 functional binding occupancy in the investigated chromatin regions. We previously determined that  
261 13,226 regions exhibit increased chromatin accessibility after pDC activation. Out of these, 2,174  
262 regions were associated with the promoter of one or more genes. An unbiased motif enrichment search  
263 revealed that TFs belonging to the NF $\kappa$ B family (e.g. NF $\kappa$ B1, NF $\kappa$ B2, TF65), the AP-1 family (e.g. ATF3,  
264 JUN, FOSB), and the JAK-STAT family (e.g. STAT1, STAT2), as well as pDC cell fate TFs (e.g. RUNX2,  
265 IRF8) are among the top hits for TFs with DNA binding domains present in promoter associated  
266 chromatin regions which gain accessibility after pDC activation (**Table S2**). In summary, the differences  
267 in chromatin landscapes of naïve and 2h CpG stimulated pDCs point to a substantial amount of  
268 epigenetic modulation of thousands of pDC regions. Also, these analyses unravelled the AP-1 family of  
269 TFs, which have so far been less well characterized in pDC biology, as possibly important players in  
270 these cells after activation.

271

### 272 **TFs show activation-dependent expression and chromatin accessibility**

273 As shown above, pDC activation results in significant alterations of the chromatin landscape in pDCs  
274 making the DNA more or less accessible to specific TF families on a global level. We next analysed the  
275 impact of pDC activation on regions associated with TF genes themselves by evaluating regions ranging  
276 from 1kb upstream of the transcriptional start site (TSS) to 1kb downstream of the poly adenylation site.  
277 pDC activation altered the chromatin landscape of ~750 accessible regions associated with TF genes  
278 ( $|FC|>2$ ,  $p<0.05$ , **Fig. 5A**). In detail, 2h stimulation of pDCs resulted in 627 peaks with increased  
279 accessibility and 126 peaks with decreased accessibility to regions associated with TF genes (**Fig. 5A**).

280 83% of all CpG-dependent chromatin regions in 2h stimulated pDCs exhibited increased DNA  
281 accessibility as compared to naïve pDCs. This suggests that most of the chromatin landscape  
282 associated with TF genes is „turned on“ rather than being „turned off“ after CpG stimulation. Finally, an  
283 integrative approach using the RNA-Seq and ATAC-Seq data was conducted analysing the differential  
284 chromatin states of regions associated with differentially expressed TF genes. This revealed 540 TF  
285 regions out of the overall ~750 chromatin regions that are significantly associated with a differential  
286 RNA expression of the respective TF gene (**Fig. 5B**). Out of these chromatin peaks we found 209  
287 unique TF genes being associated with the differentially opened chromatin regions. Thus, pDC  
288 activation modulates the chromatin of most genes in more than one region associated with the  
289 respective gene, as shown here for the NFκB family members *Nfkb1* and *Rela* (**Fig. 5B**). To identify  
290 potential novel players in pDC biology after cell activation, we integrated the results of our motif analysis,  
291 the RNA expression levels, and chromatin states for all TFs. We focused our search on factors that fulfil  
292 the following criteria after pDC stimulation: (i) increased gene expression, (ii) enhanced chromatin  
293 accessibility, and (iii) enriched TF DNA binding motif in the genomic regions that are more accessible.  
294 Mining our dataset, we found that TFs already known to be important in TLR9-mediated signaling such  
295 as IRF and NFκB TFs met the requirement as expected. Additionally, members of the AP-1 family such  
296 as ATF3 and JUN, which received little mention for pDC biology in literature so far, also fulfilled these  
297 criteria. The candidates of all three families exhibited a significantly increased mRNA expression 2h  
298 after pDC activation as compared to naïve pDCs. At 6h after stimulation, expression remained at the  
299 same level (*Jun*, *Rela*), increased further (*Irf7*) or decreased (*Atf3*, *Nfkb1*). After 12h pDC stimulation,  
300 expression remained at the same level (*Irf7*, *Atf3*) or even decreased (*Jun*, *Nfkb1*, *Rela*) (**Fig. 5C**). In  
301 line with an increased expression of the selected TFs 2h after cell activation as compared to the naïve  
302 state, we found an increased accessibility of chromatin in the proximal promoter region of the *Irf7*, *Jun*,  
303 *Atf3*, *Nfkb1*, and *Rela* genes. Two regions of the *Nfkb1* gene, one proximal and another distal from the  
304 TSS of the gene, indicated increased DNA accessibility after CpG stimulation at 2h as compared to the  
305 naïve condition. While *Atf3*, *Nfkb1* and *Rela* are characterized by single or a small number of open  
306 chromatin peaks, several peaks in the *Irf7* and *Jun* gene were found, both proximal and after the TSS  
307 in the intergenic region. Of note, the core structural elements regulating gene expression for the  
308 proximal promoter and the intergenic regions were well conserved between mouse and human for all  
309 newly identified candidates (top panels, **Fig. 5D**). The potential relevance of the AP-1 factors for pDC  
310 biology was further investigated by searching for the common AP-1 motif (TGA[G/C]TCA) (Risse et al.,  
311 1989) among all open chromatin regions associated with pDC driving TF genes (*Runx2*, *Tcf4*, *Spib*,  
312 *Irf8*, *Bcl11a*). Using the MEME-FIMO search tool, we found an AP-1 motif in the proximal promoter site  
313 of the *Tcf4* gene which encodes the E2-2 protein (**Fig. 5E**). As AP-1 has not been implicated so far in  
314 E2-2 gene regulation this finding warrants further investigation. In summary, we found that pDC  
315 activation mostly “turns on” TF genes resulting in significant expression changes along with more  
316 accessible DNA in promoter and or intergenic regions. Moreover, we newly identified the AP-1 family  
317 as a set of TFs associated with pDC activation.

318

319 **Discussion**

320 In this study we investigated the yet unknown global expression patterns of the TF reservoir of pDCs in  
321 in a time course after activation in combination with DNA accessibility analysis for implicated TF  
322 families. Combining RNA-Seq, ATAC-Seq, and GO analyses, we defined specific sets of TLR9-  
323 modulated TFs with known roles in pDC differentiation and function, but also TFs so far not implicated  
324 in pDC biology.

325 We used as the basis of our study the definition of the murine TF reservoir in the AnimalTFDB (Hu et  
326 al., 2019) and found that 70% of all genes annotated as TFs in the mouse genome (1,014 out of 1,636)  
327 were expressed in at least one condition, naïve or CpG-activated pDCs (2h, 6h, or 12h). These covered  
328 a wide range of TF classes defined by their respective DNA binding mechanisms. Interestingly, some  
329 TF families showed expression of all family members. Among those, we found factors that have been  
330 shown to be of particular importance in pDC biology, such as Runx2 of the Runt family (Sawai et al.,  
331 2013). Downstream GO analyses of RNA-Seq data allowed a biological classification of all TFs showing  
332 involvement in a wide variety of biological processes, such as the NFκB and JAK-STAT signaling. It  
333 has been well established that the production of type I IFN by pDCs upon TLR9 activation depends on  
334 the canonical TLR9-Myd88-NFκB/IRF7 signaling pathway (Tomasello et al., 2018). In this regard, it has  
335 been reported that NFκB and cREL are key players in pDC differentiation and survival programs after  
336 TLR9 activation by CpG. *Nfkb1*<sup>-/-</sup> *cRel*<sup>-/-</sup> double knock-out pDCs were still able to produce type I IFN  
337 upon CpG administration but failed to produce IL-6 or IL-12 and did not acquire a dendritic phenotype  
338 but rather underwent apoptosis (O'Keeffe et al., 2005). Here, we show for the first time the time-  
339 dependent patterns of gene expression for TFs involved in NFκB and JAK-STAT signaling upon pDC  
340 stimulation. Not only expression of these factors was enhanced in pDCs after CpG treatment, but also  
341 DNA binding sites for factors from the NFκB and JAK-STAT signaling pathways were identified as  
342 globally enriched in a differential motif analysis comparing regions with increased vs decreased  
343 chromatin accessibility. In addition, we found changed expression patterns of TFs important for  
344 circadian gene regulation in activated pDCs over time. In this regard, it has been reported that up to  
345 10% of the transcriptome is under circadian regulation (Panda et al., 2002; Storch et al., 2002),  
346 suggesting that some pDC activation-dependent changes in gene expression may be under circadian  
347 control of global TF expression. Along this line, Silver et al. showed that TLR9 function is controlled by  
348 the circadian molecular clock in a number of cell types including DCs (Silver et al., 2012). Another group  
349 of TFs that show significant changes in expression after pDC activation could be classified as SMAD  
350 proteins, classical effectors of TGFβ signaling. It is known that stimulating DC progenitors with TGFβ  
351 accelerates DC differentiation, directing development toward cDCs (Felker et al., 2010). Also, one of  
352 the SMAD proteins, SMAD3, has been determined as a key player in determining cDC versus pDC cell  
353 fates (Jeong-Hwan Yoon, 2019). Interaction of SMAD proteins with known pDC driving factors such as  
354 Zeb2 have also been described (Vandewalle et al., 2009; Wu et al., 2016). Other SMAD members do  
355 not affect pDC numbers, as shown *in vivo* in *Smad7*-deficient mice (Lukas et al., 2017). Further, TFs  
356 involved in various processes of the endoplasmic reticulum are differentially expressed in TLR9  
357 activated pDCs. Notably, mouse and human pDCs are morphologically characterized by an extensive  
358 rough ER, enabling them to rapidly secrete copious amounts of type I IFN after TLR7 and TLR9  
359 stimulation (Alcubumbre et al., 2018; Fitzgerald-Bocarsly et al., 2008). The enrichment of TFs involved



360 in mRNA binding processes, sumoylation and epigenetic modifications further highlights the changing  
361 biology of pDCs in protein production, posttranslational protein modifications, and alteration of the  
362 physical DNA structure that regulates gene expression after cell activation. We hereby define a novel  
363 set of expressed TFs in TLR9 activated pDCs, thus identifying TFs involved in particular biological  
364 processes that may require further investigation for their functional role in activated pDCs. The global  
365 transcriptomics approach allows a comparison for the expression patterns of several TFs belonging to  
366 the same TF family or involved in the same biological process, which may help to further narrow down  
367 interesting candidates.

368 Using CpG as an optimal TLR9 agonist and focusing on early events after virus infection, we found that  
369 after pDC activation more of the pDC chromatin landscape is „turned on“ rather than „turned off“, both  
370 globally in the genome and also among the regions associated with TF genes themselves. Specifically,  
371 about 80% of all regions that show significant chromatin changes exhibited increased accessibility for  
372 TFs. However, with regard to gene expression, 2h after pDC activation more genes were down-  
373 regulated than up-regulated as compared to the naïve state. One explanation could be that while DNA  
374 is more accessible, the TFs that possibly bind to these DNA stretches may inhibit rather than activate  
375 gene expression. An extensive motif analysis revealed that TFs belonging to the JAK-STAT and the  
376 NFkB signaling pathways exhibit increased accessibility to DNA binding regions after pDC stimulation.  
377 This underlines the importance of the JAK-STAT and NFkB signaling pathways in activated pDCs.

378 In contrast, Ets family members belonging to the Helix-turn-helix family of TFs and Zinc-coordinating  
379 zf-C2H2 TFs were both found to have less access to DNA after pDC activation. Ets family members  
380 include SPI1, also known as PU.1, which has been shown to drive the development of precursor cells  
381 toward cDC rather than pDC development (Chopin et al., 2019). Regarding pDC-driving cell fate TFs,  
382 IRF8 and RUNX2 belonging to the helix-turn-helix and  $\beta$ -scaffold TF groups, respectively, show motif  
383 enrichment in two sets of regions exhibiting increased versus decreased chromatin accessibility after  
384 pDC activation. Hence, cell fate TFs that drive pDC development both gain and lose access to distinct  
385 DNA regions after TLR9 activation.

386 Gene expression of the key pDC cell fate TFs IRF8, E2-2, and RUNX2 has been shown to steadily  
387 increase in expression during pDC precursor development into fully differentiated pDCs (Bornstein et  
388 al., 2014; Sasaki et al., 2012; Sawai et al., 2013; Tamura et al., 2005; Tsujimura et al., 2002). However,  
389 the role of these TFs for pDC survival and differentiation has not been investigated in detail after TLR9  
390 activation. Here we observed different gene expression patterns for E2-2, and RUNX2 after pDC  
391 activation. E2-2 expression is strongly up-regulated at 2h and 6h of CpG stimulation vs no stimulation,  
392 but not at 12h after CpG activation vs steady state. Runx2, on the other hand, is strongly down-regulated  
393 at each CpG stimulation time point as compared to the naïve state.

394 Our results therefore warrant further investigations of pDC cell fate TFs to explore the biological  
395 relevance of distinct expression patterns as well as the simultaneous gain and loss of accessibility to  
396 DNA by modulation of chromatin after pDC activation. We found that IRF7, NFkB1, and RELA as well  
397 as ATF3 and JUN, two AP-1 family members, fulfil three criteria relevant in this context: They exhibit (i)  
398 increased gene expression, (ii) enhanced chromatin accessibility for their gene regions, and (iii)  
399 enriched TF DNA binding motifs in the accessible genomic regions after pDC stimulation. We used this

400 integrative omics approach to identify potential novel players important in pDC biology after cell  
401 activation. While the role for IRF7, NFκB1, and RELA have been described in activated pDCs, there is  
402 little known about any function of AP-1 factors in pDCs. Activator Protein-1 (AP-1) was one of the first  
403 TFs to be described in the 1980s (Angel et al., 1987). It consists of a dimeric protein complex with  
404 members from the JUN, FOS, ATF, BATF, or MAF protein families (Eferl and Wagner, 2003; Shaulian  
405 and Karin, 2002). A shared feature between the members is a basic leucine-zipper (bZIP) domain which  
406 is required for dimerization and DNA binding. The AP-1 family of TFs are known to regulate various  
407 biological processes such as proliferation, differentiation, and cell survival (Eferl and Wagner, 2003;  
408 Murphy et al., 2013; Sopel et al., 2016; Wagner and Eferl, 2005). They have further been implicated in  
409 a variety of pathologies ranging from cardiovascular disease to cancer, hepatitis, and Parkinson's  
410 disease (Meijer et al., 2012; Muslin, 2008; Uchihashi et al., 2011). A connection has been established  
411 between NFκB and AP-1 activity, which may be regulated by NFκB (Fujioka et al., 2004) suggesting a  
412 possible common molecular mechanism of these TFs in activated pDCs. Further, AP-1 has been shown  
413 to be required for spontaneous type I IFN production in pDCs, whereas type I IFN production triggered  
414 by pathogen receptor recognition such as TLR stimulation was not affected by AP-1 inhibition (Kim et  
415 al., 2014). In contrast, our *in silico* analyses suggest a close link between AP-1 factors and pDC biology  
416 after TLR9 stimulation: The AP-1 motif is present within the open chromatin region of the proximal  
417 promoter site of the *Tcf4* gene, a prominent pDC cell fate TF. Grajkowska *et al.* showed that there are  
418 two *Tcf4* isoforms, the expression of which is controlled during pDC differentiation by two respective  
419 promoters as well as distal enhancer regions within 600-900 kb 5' and ~150 kb 3' of the *Tcf4* gene  
420 (Grajkowska et al., 2017). However, the binding site of specific TFs to these cis-regulatory sites has not  
421 been fully evaluated. This calls for further investigations on the AP-1 binding site in activated pDCs  
422 newly identified in our study. One of the key AP-1 candidates in our investigation, ATF3, has been  
423 described as a negative regulator of antiviral signaling in Japanese encephalitis virus infection in mouse  
424 neuronal cells (Sood et al., 2017). The hallmark of pDCs is their importance in antiviral immune  
425 responses, pointing toward ATF3 as an interesting candidate to investigate in TLR9 activated pDCs.  
426 Another AP-1 family member, JUN, was the first oncogene to be described (Curran and Franza, 1988)  
427 and has since been studied in detail in the context of various tumor entities. In contrast, knowledge  
428 about its role in the context of infection is limited. For example, it has been shown to have a regulatory  
429 role in H5N1 influenza virus replication and host inflammation in mice (Xie et al., 2014). Our analyses  
430 revealed a distinct regulation of *Jun* expression and chromatin structure combined with an increased  
431 global DNA binding accessibility in pDCs after activation. Further studies are required to assess the role  
432 of *Jun* regulation in pDCs upon a microbial stimulus or in a chronically activated state that might unravel  
433 unknown functions of this TF in immunity. While targeting TFs for therapeutic purpose has been proven  
434 difficult so far, recent advances have been made through novel chemistries and the use of staples  
435 peptides to disrupt protein-protein interactions (Ball et al., 2016; Rezaei Araghi et al., 2018). Thus, the  
436 *in silico* analyses of the global TF reservoir in pDCs from our study led to the identification of novel  
437 candidates that warrant further investigation regarding their role in pDC biology, in particular after cell  
438 activation, which may lead to the development of novel therapeutics to treat infection, autoimmune  
439 disease and cancer.

440

#### 441 **Author Contributions**

442 RM analysed the data. SA performed BM Flt3-L pDC cultures and FACS sorted pDCs for the RNA-Seq  
443 and ATAC-Seq assays. PP and KK conducted RNA-Seq including primary analyses. RM, JA, and SS  
444 wrote the manuscript.

445

#### 446 **Declaration of Interests**

447 The authors declare no conflict of interest.

448

#### 449 **Materials and Methods**

450

##### 451 **Mice**

452 C57BL/6N mice were housed under specific pathogen-free conditions in the animal research facility of  
453 the University of Düsseldorf according to German animal welfare guidelines. All experiments were  
454 performed with sex and age matched littermates between 7 to 14 weeks of age.

455

##### 456 **Generation and stimulation of BM-derived pDCs for RNA-Seq and ATAC-Seq**

457 BM-derived Flt3-L cultured pDCs were generated as previously described (Scheu et al., 2008). For  
458 RNA-Seq, BM-derived pDCs (CD3<sup>+</sup>CD19<sup>+</sup>CD11c<sup>+</sup>CD11b<sup>low</sup>B220<sup>+</sup>SiglecH<sup>+</sup>CD317<sup>+</sup>) were FACS purified  
459 using FACS Aria III (BD). The pDCs were left untreated or stimulated with 1 $\mu$ M CpG 2216 (Tib Molbiol,  
460 Nr. 9305071) complexed to transfection reagent DOTAP (Roche) for 2h, 6h or 12 h. RNA was isolated  
461 by using the NucleoSpin II RNA mini kit (Macherey-Nagel) and subjected to RNA-Seq. For ATAC-Seq  
462 BM-derived pDCs (CD3<sup>+</sup>CD19<sup>+</sup>CD11c<sup>+</sup>CD11b<sup>low</sup>B220<sup>+</sup>SiglecH<sup>+</sup>CD317<sup>+</sup>) were FACS purified using  
463 FACS Aria III (BD). The pDCs were left untreated or stimulated with 1 $\mu$ M CpG 2216 complexed to  
464 transfection reagent DOTAP (Roche) for 2h. At the end of stimulation time, cells were kept on ice and  
465 stained for 7AAD (BD). Live cells (7AAD<sup>-</sup>) were further purified by FACS and kept frozen in complete  
466 RPMI medium containing 5% DMSO. The frozen cells were transported on dry ice to Active Motif  
467 (Belgium) for ATAC-Seq.

468 The following antibodies have been used: CD3-PerCP (BD Bioscience, Clone: 145-2C11), CD19-  
469 PerCP-Cy5.5 (BD Bioscience, Clone:1D3), CD11c-PE-Cy7 (BioLegend, Clone: N418), CD11b-APC-  
470 Cy7 (BD Bioscience, Clone: M1/70), B220-FITC (BD Bioscience, Clone: RA3-6B2), SiglecH-APC  
471 (BioLegend, Clone 551), CD317-PE (eBioscience/Thermoscientific, Clone: ebio927).

472

##### 473 **RNA-Seq Analyses**

474 DNase digested total RNA samples used for transcriptome analyses were quantified (Qubit RNA HS  
475 Assay, Thermo Fisher Scientific) and quality measured by capillary electrophoresis using the Fragment  
476 Analyzer and the 'Total RNA Standard Sensitivity Assay' (Agilent Technologies, Inc. Santa Clara, USA).  
477 All samples in this study showed high RNA Quality Numbers (RQN; mean = 9.9). The library preparation  
478 was performed according to the manufacturer's protocol using the Illumina® 'TruSeq Stranded mRNA  
479 Library Prep Kit'. Briefly, 200 ng total RNA were used for mRNA capturing, fragmentation, the synthesis

480 of cDNA, adapter ligation and library amplification. Bead purified libraries were normalized and  
481 sequenced on the HiSeq 3000/4000 system (Illumina Inc. San Diego, USA) with a read setup of SR  
482 1x150 bp. The bcl2fastq tool was used to convert the bcl files to fastq files as well for adapter trimming  
483 and demultiplexing.

484 Data analyses on fastq files were conducted with CLC Genomics Workbench (version 11.0.1, QIAGEN,  
485 Venlo, NL). The reads of all probes were adapter trimmed (Illumina TruSeq) and quality trimmed (using  
486 the default parameters: bases below Q13 were trimmed from the end of the reads, ambiguous  
487 nucleotides maximal 2). Mapping was done against the *Mus musculus* (mm10; GRCm38.86) (March  
488 24, 2017) genome sequence. Samples (three biological replicates each) were grouped according to  
489 their respective experimental condition. Raw counts were next re-uploaded to the Galaxy web platform.  
490 The public server at usegalaxy.org was used to perform multi-group comparisons (Afgan et al., 2016).  
491 Differential expression of genes between any two conditions was calculated using the edgeR quasi-  
492 likelihood pipeline which uses negative binomial generalized linear models with F-test (Liu et al., 2015;  
493 Robinson et al., 2010). Low expressing genes were filtered with a count-per-million (CPM) value cut-off  
494 that was calculated based on the average library size of our RNA-Seq experiment (Chen et al., 2016).  
495 The resulting p values were corrected for multiple testing by the false discovery rate (FDR) (Benjamini,  
496 1995). A p value of <0.05 was considered significant. RNA-Seq data are deposited with NCBI's Gene  
497 Expression Omnibus (GEO) and are accessible through GEO Series accession number GSE170750  
498 (<https://www.ncbi.nlm.nih.gov/geo/query/acc.cgi?acc=GSE170750>).

499

#### 500 **ATAC-Seq**

501 Cells were harvested and frozen in culture media containing FBS and 5% DMSO. Cryopreserved cells  
502 were sent to Active Motif to perform the ATAC-Seq assay. The cells were then thawed in a 37°C water  
503 bath, pelleted, washed with cold PBS, and tagmented as previously described (Buenrostro et al., 2013),  
504 with some modifications (Corces et al., 2017). Briefly, cell pellets were resuspended in lysis buffer,  
505 pelleted, and tagmented using the enzyme and buffer provided in the Nextera Library Prep Kit (Illumina).  
506 Tagmented DNA was then purified using the MinElute PCR purification kit (Qiagen), amplified with 10  
507 cycles of PCR, and purified using Agencourt AMPure SPRI beads (Beckman Coulter). Resulting  
508 material was quantified using the KAPA Library Quantification Kit for Illumina platforms (KAPA  
509 Biosystems), and sequenced with PE42 sequencing on the NextSeq 500 sequencer (Illumina).

510 Reads were aligned using the BWA algorithm (mem mode; default settings). Duplicate reads were  
511 removed, only reads mapping as matched pairs and only uniquely mapped reads (mapping quality  $\geq 1$ )  
512 were used for further analysis. Alignments were extended *in silico* at their 3'-ends to a length of 200 bp  
513 and assigned to 32-nt bins along the genome. The resulting histograms (genomic "signal maps") were  
514 stored in bigWig files. Peaks were identified using the MACS 2.1.0 algorithm at a cut off of p-value  $1e-7$ ,  
515 without control file, and with the `-nomodel` option. Peaks that were on the ENCODE blacklist of known  
516 false ATAC-Seq peaks were removed. Signal maps and peak locations were used as input data to  
517 Active Motifs proprietary analysis program, which creates Excel tables containing detailed information  
518 on sample comparison, peak metrics, peak locations, and gene annotations. For differential analysis,  
519 reads were counted in all merged peak regions (using Subread), and the replicates for each condition

520 were compared using DESeq2. ATAC-Seq data are deposited with NCBI's GEO and are accessible  
521 through GEO Series accession number GSE171075  
522 (<https://www.ncbi.nlm.nih.gov/geo/query/acc.cgi?acc=GSE171075>).

523

#### 524 **Downstream analyses and visualization of omics data**

525 Volcano plots were created using ggplot2 (Wickham, 2016) and ggrepel (Slowikowski, 2020).  
526 Heatmaps were created using Morpheus (<https://software.broadinstitute.org/morpheus>). Pearson  
527 correlation matrices were calculated in R and plotted as heatmaps using gplots (Gregory R. Warnes,  
528 2020). Pathway analyses for different gene ontology (GO) terms and subsequent functional  
529 classification and annotation clustering were performed using the Database for Annotation,  
530 Visualization and Integrated Discovery (DAVID) (Huang da et al., 2009). Evolutionary conserved  
531 regions (ECR) for selected genes were shown by taking a screenshot from the ECR browser  
532 (Ovcharenko et al., 2004). Bar graphs were plotted in GraphPad Prism version 8.4.3 on Windows  
533 (GraphPad Software, La Jolla California USA, [www.graphpad.com](http://www.graphpad.com)). ATAC-Seq peaks were  
534 visualized using IGV (Robinson et al., 2011; Thorvaldsdottir et al., 2013).

535

#### 536 **TF Motif Analyses**

537 ATAC-Seq regions that indicated differentially accessible chromatin regions between naïve and 2h CpG  
538 stimulated samples (DESeq2,  $|FC| > 2$ ,  $p < 0.05$ ) were used for motif analysis. The regions were adjusted  
539 to the same size (500bp). The MEME-Centrino differential motif analysis pipeline (Bailey and  
540 Machanick, 2012) was run on the fasta files representing each chromatin region (significantly increased  
541 vs decreased chromatin access after CpG stimulation) to identify overrepresented motifs, using default  
542 parameters and the HOCOMOCO v11 motif database. The search for the AP-1 motif among selected  
543 sequences was performed with MEME-FIMO.

544

545

#### 546 **Figure legends**

547

548 **Fig. 1 Expression of transcription factors in pDCs.** **A** Expression of TFs in pDCs in at least one of  
549 the following conditions: naïve, CpG 2h, 6h or 12h (n=3 per condition). **B** Categorization of the  
550 expressed TFs according to Hu *et al.* (Hu et al., 2019). **C** Number of expressed vs non-expressed genes  
551 per TF family of a TF class is plotted.

552

553 **Fig. 2 RNA-Seq reveals significant TF expression changes after pDC activation.** **A** Pearson  
554 correlation plot for samples used in RNA-Seq. pDCs (CD3<sup>+</sup>CD19<sup>-</sup>  
555 CD11c<sup>+</sup>CD11b<sup>low</sup>B220<sup>+</sup>SiglecH<sup>+</sup>CD317<sup>+</sup>) were sorted from BM-derived Flt3-L cultures of C57BL/6N  
556 mice and cells were left either naïve or stimulated with CpG for 2h, 6h or 12h. **B** Volcano plots showing  
557 global expression of genes in sorted pDCs at steady state and after 2h, 6h, and 12h of CpG stimulation.  
558 TF genes with a  $|FC| > 2$  and a p-value of  $< 0.05$  corrected for the false discovery rate (FDR) were  
559 considered significantly differentially expressed and are marked in colour (red and blue). **C** Heatmap



560 showing normalized expression values (cpm, count per million) of differentially expressed TF genes  
561 from (B) in pDCs at steady state and after 2h, 6h, and 12h of CpG stimulation. Hierarchical clustering  
562 on rows with average linkage and the One minus Pearson correlation metric was performed.

563

564 **Fig. 3 Gene Ontology analysis of CpG-dependent TFs.** 661 CpG-dependent TFs ( $|FC| > 2$ ,  $p < 0.05$ )  
565 were analysed by DAVID functional annotation to produce gene clusters ( $> 2$  genes/cluster)  
566 corresponding to biological process (BP), molecular function (MF), and cellular component (CC) GO  
567 annotation terms. Those significantly associated with the TF gene list are plotted with the numbers of  
568 genes for each term along with the fold enrichment for each term. A few terms were excluded as being  
569 redundant or having wider meaning (Table S1). Abbreviations are as follows: casc = cascade; cyt =  
570 cytokine; horm = hormone; med = mediated; reg = regulation; rERs = response to endoplasmic  
571 reticulum stress; resp = response; sig = signaling.

572

573 **Fig. 4 pDC activation increases and decreases chromatin accessibility of thousands of regions.**

574 **A** Pearson correlation plot for samples used in ATAC-Seq. pDCs ( $CD3^+CD19^-$   
575  $CD11c^+CD11b^{low}B220^+SiglecH^+CD317^+$ ) were sorted from BM-derived Flt3-L cultures of C57BL/6N  
576 mice and cells were left either naïve or stimulated with CpG for 2h ( $n=2$ ). **B** Genomic location distribution  
577 of open chromatin sites in naïve and CpG stimulated pDCs according to ATAC-Seq. Two biological  
578 replicates were used per condition, and results are shown for pooled samples per condition. **C** Number  
579 of differentially accessible peaks detected using DESeq2, comparing naïve to 2h CpG stimulated pDCs,  
580  $|FC| > 2$  and  $p < 0.05$ . **D** Heatmap of normalized ATAC-Seq peak intensities ( $\log_2FC$  relative to the mean  
581 for each peak). Limited to peaks (16,607) that are condition-dependent with  $|FC| > 2$  and  $p < 0.05$  for at  
582 least one pairwise comparison of interest. **E** Differential motif analysis for cluster I and II from (D) using  
583 MEME Centrimo and the HOCOMOCO v11 motif database. Significant motifs were categorized into  
584 known TF families for visualization and interpretation.

585

586 **Fig. 5 TFs show CpG-dependent expression and chromatin accessibility.** **A** Number of  
587 differentially accessible peaks of genomic regions associated with TF genes detected using DESeq2  
588 comparing naïve to 2h CpG stimulated pDCs,  $|FC| > 2$  and  $p < 0.05$ . **B** Heatmap of normalized ATAC-Seq  
589 peak intensities ( $\log_2FC$  relative to the mean for each peak) limited to 540 peaks from (A) that are  
590 condition-dependent with  $|FC| > 2$  and  $p < 0.05$  for at least one pairwise comparison of interest. **C** The bar  
591 graph depicts normalized expression values obtained from RNA-Seq and statistics calculated with  
592 edgeR. **D, E** Top panel presents screen shots from the ECR (evolutionary conserved regions) Browser  
593 web site of the respective indicated gene. Exonic regions are shown in blue, intronic regions in pink,  
594 UTRs in yellow, and CNS in red. Bottom panels present ATAC-Seq peaks in naïve and CpG stimulated  
595 (2h) pDCs for the indicated genes visualized with IGV. The AP-1 motif within the promoter sequence of  
596 the *Tcf4* gene is highlighted in (E).

597

598 **Acknowledgements**

599 This work was funded by the German Research Foundation (DFG – SCHE692/6-1) and the Manchot  
600 Graduate Schools 'Molecules of Infection III' to SS and the DFG EXC 1003, Grant FF-2014-01 Cells in  
601 Motion–Cluster of Excellence, Münster, Germany, and the DFG FOR2107 AL1145/5-2 to JA.  
602 Computational support of the Zentrum für Informations- und Medientechnologie, especially the HPC  
603 team (High Performance Computing) at the University of Düsseldorf is acknowledged. We thank  
604 Johannes Ptok and Heiner Schaal (Institute of Virology, University of Düsseldorf) for critical reading of  
605 the manuscript.

606

## 607 **References**

608 Afgan, E., Baker, D., van den Beek, M., Blankenberg, D., Bouvier, D., Cech, M., Chilton, J., Clements,  
609 D., Coraor, N., Eberhard, C., *et al.* (2016). The Galaxy platform for accessible, reproducible and  
610 collaborative biomedical analyses: 2016 update. *Nucleic Acids Res* **44**, W3-W10.

611 Alculumbre, S.G., Saint-Andre, V., Di Domizio, J., Vargas, P., Sirven, P., Bost, P., Maurin, M., Maiuri,  
612 P., Wery, M., Roman, M.S., *et al.* (2018). Diversification of human plasmacytoid predendritic cells in  
613 response to a single stimulus. *Nat Immunol* **19**, 63-75.

614 Ali, S., Mann-Nuttel, R., Schulze, A., Richter, L., Alferink, J., and Scheu, S. (2019). Sources of Type I  
615 Interferons in Infectious Immunity: Plasmacytoid Dendritic Cells Not Always in the Driver's Seat. *Front*  
616 *Immunol* **10**, 778.

617 Angel, P., Imagawa, M., Chiu, R., Stein, B., Imbra, R.J., Rahmsdorf, H.J., Jonat, C., Herrlich, P., and  
618 Karin, M. (1987). Phorbol ester-inducible genes contain a common cis element recognized by a TPA-  
619 modulated trans-acting factor. *Cell* **49**, 729-739.

620 Aravind, L., Anantharaman, V., Balaji, S., Babu, M.M., and Iyer, L.M. (2005). The many faces of the  
621 helix-turn-helix domain: transcription regulation and beyond. *FEMS Microbiol Rev* **29**, 231-262.

622 Asselin-Paturel, C., Boonstra, A., Dalod, M., Durand, I., Yessaad, N., Dezutter-Dambuyant, C., Vicari,  
623 A., O'Garra, A., Biron, C., Briere, F., and Trinchieri, G. (2001). Mouse type I IFN-producing cells are  
624 immature APCs with plasmacytoid morphology. *Nat Immunol* **2**, 1144-1150.

625 Bailey, T.L., and Machanick, P. (2012). Inferring direct DNA binding from ChIP-seq. *Nucleic Acids Res*  
626 **40**, e128.

627 Ball, D.P., Lewis, A.M., Williams, D., Resetca, D., Wilson, D.J., and Gunning, P.T. (2016). Signal  
628 transducer and activator of transcription 3 (STAT3) inhibitor, S3I-201, acts as a potent and non-  
629 selective alkylating agent. *Oncotarget* **7**, 20669-20679.

630 Bauer, J., Dress, R.J., Schulze, A., Dresing, P., Ali, S., Deenen, R., Alferink, J., and Scheu, S. (2016).  
631 Cutting Edge: IFN-beta Expression in the Spleen Is Restricted to a Subpopulation of Plasmacytoid  
632 Dendritic Cells Exhibiting a Specific Immune Modulatory Transcriptome Signature. *J Immunol* **196**,  
633 4447-4451.

634 Benjamini, Y.H., Yosef (1995). Controlling the false discovery rate: a practical and powerful approach  
635 to multiple testing. *Journal of the Royal Statistical Society, Series B* **57** (1): 289–300.

636 Bornstein, C., Winter, D., Barnett-Itzhaki, Z., David, E., Kadri, S., Garber, M., and Amit, I. (2014). A  
637 negative feedback loop of transcription factors specifies alternative dendritic cell chromatin States.  
638 *Mol Cell* **56**, 749-762.

639 Buenrostro, J.D., Giresi, P.G., Zaba, L.C., Chang, H.Y., and Greenleaf, W.J. (2013). Transposition of  
640 native chromatin for fast and sensitive epigenomic profiling of open chromatin, DNA-binding proteins  
641 and nucleosome position. *Nat Methods* 10, 1213-1218.

642 Chauvistre, H., and Sere, K. (2020). Epigenetic aspects of DC development and differentiation. *Mol*  
643 *Immunol* 128, 116-124.

644 Chen, Y., Lun, A.T., and Smyth, G.K. (2016). From reads to genes to pathways: differential  
645 expression analysis of RNA-Seq experiments using Rsubread and the edgeR quasi-likelihood  
646 pipeline. *F1000Res* 5, 1438.

647 Chopin, M., Lun, A.T., Zhan, Y., Schreuder, J., Coughlan, H., D'Amico, A., Mielke, L.A., Almeida, F.F.,  
648 Kueh, A.J., Dickins, R.A., *et al.* (2019). Transcription Factor PU.1 Promotes Conventional Dendritic  
649 Cell Identity and Function via Induction of Transcriptional Regulator DC-SCRIPT. *Immunity* 50, 77-90  
650 e75.

651 Chopin, M., Preston, S.P., Lun, A.T.L., Tellier, J., Smyth, G.K., Pellegrini, M., Belz, G.T., Corcoran,  
652 L.M., Visvader, J.E., Wu, L., and Nutt, S.L. (2016). RUNX2 Mediates Plasmacytoid Dendritic Cell  
653 Egress from the Bone Marrow and Controls Viral Immunity. *Cell Rep* 15, 866-878.

654 Christensen, S.R., Shupe, J., Nickerson, K., Kashgarian, M., Flavell, R.A., and Shlomchik, M.J.  
655 (2006). Toll-like receptor 7 and TLR9 dictate autoantibody specificity and have opposing inflammatory  
656 and regulatory roles in a murine model of lupus. *Immunity* 25, 417-428.

657 Cisse, B., Caton, M.L., Lehner, M., Maeda, T., Scheu, S., Locksley, R., Holmberg, D., Zweier, C., den  
658 Hollander, N.S., Kant, S.G., *et al.* (2008). Transcription factor E2-2 is an essential and specific  
659 regulator of plasmacytoid dendritic cell development. *Cell* 135, 37-48.

660 Corces, M.R., Trevino, A.E., Hamilton, E.G., Greenside, P.G., Sinnott-Armstrong, N.A., Vesuna, S.,  
661 Satpathy, A.T., Rubin, A.J., Montine, K.S., Wu, B., *et al.* (2017). An improved ATAC-seq protocol  
662 reduces background and enables interrogation of frozen tissues. *Nat Methods* 14, 959-962.

663 Curran, T., and Franza, B.R., Jr. (1988). Fos and Jun: the AP-1 connection. *Cell* 55, 395-397.

664 Deaton, A.M., and Bird, A. (2011). CpG islands and the regulation of transcription. *Genes Dev* 25,  
665 1010-1022.

666 Decque, A., Joffre, O., Magalhaes, J.G., Cossec, J.C., Blecher-Gonen, R., Lapaquette, P., Silvin, A.,  
667 Manel, N., Joubert, P.E., Seeler, J.S., *et al.* (2016). Sumoylation coordinates the repression of  
668 inflammatory and anti-viral gene-expression programs during innate sensing. *Nat Immunol* 17, 140-  
669 149.

670 Diebold, S.S., Kaisho, T., Hemmi, H., Akira, S., and Reis e Sousa, C. (2004). Innate antiviral  
671 responses by means of TLR7-mediated recognition of single-stranded RNA. *Science* 303, 1529-1531.

672 Drouin, J. (2014). Minireview: pioneer transcription factors in cell fate specification. *Mol Endocrinol* 28,  
673 989-998.

674 Eferl, R., and Wagner, E.F. (2003). AP-1: a double-edged sword in tumorigenesis. *Nat Rev Cancer* 3,  
675 859-868.

676 Elkon, K.B., and Wiedeman, A. (2012). Type I IFN system in the development and manifestations of  
677 SLE. *Curr Opin Rheumatol* 24, 499-505.

- 678 Felker, P., Sere, K., Lin, Q., Becker, C., Hristov, M., Hieronymus, T., and Zenke, M. (2010). TGF-  
679 beta1 accelerates dendritic cell differentiation from common dendritic cell progenitors and directs  
680 subset specification toward conventional dendritic cells. *J Immunol* *185*, 5326-5335.
- 681 Fitzgerald-Bocarsly, P., Dai, J., and Singh, S. (2008). Plasmacytoid dendritic cells and type I IFN: 50  
682 years of convergent history. *Cytokine Growth Factor Rev* *19*, 3-19.
- 683 Fujioka, S., Niu, J., Schmidt, C., Sclabas, G.M., Peng, B., Uwagawa, T., Li, Z., Evans, D.B.,  
684 Abbruzzese, J.L., and Chiao, P.J. (2004). NF-kappaB and AP-1 connection: mechanism of NF-  
685 kappaB-dependent regulation of AP-1 activity. *Mol Cell Biol* *24*, 7806-7819.
- 686 Fulton, D.L., Sundararajan, S., Badis, G., Hughes, T.R., Wasserman, W.W., Roach, J.C., and Sladek,  
687 R. (2009). TFCat: the curated catalog of mouse and human transcription factors. *Genome Biol* *10*,  
688 R29.
- 689 Gilliet, M., Cao, W., and Liu, Y.J. (2008). Plasmacytoid dendritic cells: sensing nucleic acids in viral  
690 infection and autoimmune diseases. *Nat Rev Immunol* *8*, 594-606.
- 691 Grajkowska, L.T., Ceribelli, M., Lau, C.M., Warren, M.E., Tiniakou, I., Nakandakari Higa, S., Bunin, A.,  
692 Haecker, H., Mirny, L.A., Staudt, L.M., and Reizis, B. (2017). Isoform-Specific Expression and  
693 Feedback Regulation of E Protein TCF4 Control Dendritic Cell Lineage Specification. *Immunity* *46*,  
694 65-77.
- 695 Gregory R. Warnes, B.B., Lodewijk Bonebakker, Robert Gentleman, Wolfgang Huber, Andy Liaw,  
696 Thomas Lumley, Martin Maechler, Arni Magnusson, Steffen Moeller, Marc Schwartz and Bill Venables  
697 (2020). gplots: Various R Programming Tools for Plotting Data. *ScienceOpen*.
- 698 Hayashi, T., Beck, L., Rossetto, C., Gong, X., Takikawa, O., Takabayashi, K., Broide, D.H., Carson,  
699 D.A., and Raz, E. (2004). Inhibition of experimental asthma by indoleamine 2,3-dioxygenase. *J Clin*  
700 *Invest* *114*, 270-279.
- 701 Hornung, V., Rothenfusser, S., Britsch, S., Krug, A., Jahrsdorfer, B., Giese, T., Endres, S., and  
702 Hartmann, G. (2002). Quantitative expression of toll-like receptor 1-10 mRNA in cellular subsets of  
703 human peripheral blood mononuclear cells and sensitivity to CpG oligodeoxynucleotides. *J Immunol*  
704 *168*, 4531-4537.
- 705 Hu, H., Miao, Y.R., Jia, L.H., Yu, Q.Y., Zhang, Q., and Guo, A.Y. (2019). AnimalTFDB 3.0: a  
706 comprehensive resource for annotation and prediction of animal transcription factors. *Nucleic Acids*  
707 *Res* *47*, D33-D38.
- 708 Huang da, W., Sherman, B.T., and Lempicki, R.A. (2009). Systematic and integrative analysis of large  
709 gene lists using DAVID bioinformatics resources. *Nat Protoc* *4*, 44-57.
- 710 Ishii, K.J., and Akira, S. (2006). Innate immune recognition of, and regulation by, DNA. *Trends*  
711 *Immunol* *27*, 525-532.
- 712 Jeong-Hwan Yoon, E.B., Katsuko Sudo, Jin Soo Han, Seok Hee Park, Susumu Nakae, Tadashi  
713 Yamashita, In-Kyu Lee, Ji Hyeon Ju, Isao Matsumoto, Takayuki Sumida, Masahiko Kuroda, Keiji  
714 Miyazawa, Mitsuyasu Kato, Mizuko Mamura (2019). SMAD3 Determines Conventional versus  
715 Plasmacytoid Dendritic Cell Fates. *bioRxiv*.

- 716 Kanamori, M., Konno, H., Osato, N., Kawai, J., Hayashizaki, Y., and Suzuki, H. (2004). A genome-  
717 wide and nonredundant mouse transcription factor database. *Biochem Biophys Res Commun* 322,  
718 787-793.
- 719 Kim, S., Kaiser, V., Beier, E., Bechheim, M., Guenther-Biller, M., Ablasser, A., Berger, M., Endres,  
720 S., Hartmann, G., and Hornung, V. (2014). Self-priming determines high type I IFN production by  
721 plasmacytoid dendritic cells. *Eur J Immunol* 44, 807-818.
- 722 Kulakovskiy, I.V., Vorontsov, I.E., Yevshin, I.S., Sharipov, R.N., Fedorova, A.D., Rumynskiy, E.I.,  
723 Medvedeva, Y.A., Magana-Mora, A., Bajic, V.B., Papatsenko, D.A., *et al.* (2018). HOCOMOCO:  
724 towards a complete collection of transcription factor binding models for human and mouse via large-  
725 scale ChIP-Seq analysis. *Nucleic Acids Res* 46, D252-D259.
- 726 Le Mercier, I., Poujol, D., Sanlaville, A., Sisirak, V., Gobert, M., Durand, I., Dubois, B., Treilleux, I.,  
727 Marvel, J., Vlach, J., *et al.* (2013). Tumor promotion by intratumoral plasmacytoid dendritic cells is  
728 reversed by TLR7 ligand treatment. *Cancer Res* 73, 4629-4640.
- 729 Lee, J.U., Kim, L.K., and Choi, J.M. (2018). Revisiting the Concept of Targeting NFAT to Control T  
730 Cell Immunity and Autoimmune Diseases. *Front Immunol* 9, 2747.
- 731 Li, S., Wu, J., Zhu, S., Liu, Y.J., and Chen, J. (2017). Disease-Associated Plasmacytoid Dendritic  
732 Cells. *Front Immunol* 8, 1268.
- 733 Libermann, T.A., and Zerbini, L.F. (2006). Targeting transcription factors for cancer gene therapy.  
734 *Curr Gene Ther* 6, 17-33.
- 735 Lin, Q., Chauvistre, H., Costa, I.G., Gusmao, E.G., Mitzka, S., Hanzelmann, S., Baying, B., Klisch, T.,  
736 Moriggl, R., Henny, B., *et al.* (2015). Epigenetic program and transcription factor circuitry of dendritic  
737 cell development. *Nucleic Acids Res* 43, 9680-9693.
- 738 Liu, R., Holik, A.Z., Su, S., Jansz, N., Chen, K., Leong, H.S., Blewitt, M.E., Asselin-Labat, M.L.,  
739 Smyth, G.K., and Ritchie, M.E. (2015). Why weight? Modelling sample and observational level  
740 variability improves power in RNA-seq analyses. *Nucleic Acids Res* 43, e97.
- 741 Liu, Y.J. (2005). IPC: professional type 1 interferon-producing cells and plasmacytoid dendritic cell  
742 precursors. *Annu Rev Immunol* 23, 275-306.
- 743 Lou, Y., Liu, C., Lizee, G., Peng, W., Xu, C., Ye, Y., Rabinovich, B.A., Hailemichael, Y., Gelbard, A.,  
744 Zhou, D., *et al.* (2011). Antitumor activity mediated by CpG: the route of administration is critical. *J*  
745 *Immunother* 34, 279-288.
- 746 Lukas, D., Yogev, N., Kel, J.M., Regen, T., Mufazalov, I.A., Tang, Y., Wanke, F., Reizis, B., Muller,  
747 W., Kurschus, F.C., *et al.* (2017). TGF-beta inhibitor Smad7 regulates dendritic cell-induced  
748 autoimmunity. *Proc Natl Acad Sci U S A* 114, E1480-E1489.
- 749 Meijer, C.A., Le Haen, P.A., van Dijk, R.A., Hira, M., Hamming, J.F., van Bockel, J.H., and Lindeman,  
750 J.H. (2012). Activator protein-1 (AP-1) signalling in human atherosclerosis: results of a systematic  
751 evaluation and intervention study. *Clin Sci (Lond)* 122, 421-428.
- 752 Murphy, T.L., Tussiwand, R., and Murphy, K.M. (2013). Specificity through cooperation: BATF-IRF  
753 interactions control immune-regulatory networks. *Nat Rev Immunol* 13, 499-509.
- 754 Muslin, A.J. (2008). MAPK signalling in cardiovascular health and disease: molecular mechanisms  
755 and therapeutic targets. *Clin Sci (Lond)* 115, 203-218.



756 O'Keeffe, M., Grumont, R.J., Hochrein, H., Fuchsberger, M., Gugasyan, R., Vremec, D., Shortman,  
757 K., and Gerondakis, S. (2005). Distinct roles for the NF-kappaB1 and c-Rel transcription factors in the  
758 differentiation and survival of plasmacytoid and conventional dendritic cells activated by TLR-9  
759 signals. *Blood* 106, 3457-3464.

760 Ovcharenko, I., Nobrega, M.A., Loots, G.G., and Stubbs, L. (2004). ECR Browser: a tool for  
761 visualizing and accessing data from comparisons of multiple vertebrate genomes. *Nucleic Acids Res*  
762 32, W280-286.

763 Panda, S., Antoch, M.P., Miller, B.H., Su, A.I., Schook, A.B., Straume, M., Schultz, P.G., Kay, S.A.,  
764 Takahashi, J.S., and Hogenesch, J.B. (2002). Coordinated transcription of key pathways in the mouse  
765 by the circadian clock. *Cell* 109, 307-320.

766 Patel, L., Abate, C., and Curran, T. (1990). Altered protein conformation on DNA binding by Fos and  
767 Jun. *Nature* 347, 572-575.

768 Reizis, B. (2019). Plasmacytoid Dendritic Cells: Development, Regulation, and Function. *Immunity* 50,  
769 37-50.

770 Rezaei Araghi, R., Bird, G.H., Ryan, J.A., Jenson, J.M., Godes, M., Pritz, J.R., Grant, R.A., Letai, A.,  
771 Walensky, L.D., and Keating, A.E. (2018). Iterative optimization yields Mcl-1-targeting stapled  
772 peptides with selective cytotoxicity to Mcl-1-dependent cancer cells. *Proc Natl Acad Sci U S A* 115,  
773 E886-E895.

774 Risse, G., Jooss, K., Neuberg, M., Bruller, H.J., and Muller, R. (1989). Asymmetrical recognition of the  
775 palindromic AP1 binding site (TRE) by Fos protein complexes. *EMBO J* 8, 3825-3832.

776 Robinson, J.T., Thorvaldsdottir, H., Winckler, W., Guttman, M., Lander, E.S., Getz, G., and Mesirov,  
777 J.P. (2011). Integrative genomics viewer. *Nat Biotechnol* 29, 24-26.

778 Robinson, M.D., McCarthy, D.J., and Smyth, G.K. (2010). edgeR: a Bioconductor package for  
779 differential expression analysis of digital gene expression data. *Bioinformatics* 26, 139-140.

780 Saas, P., and Perruche, S. (2012). Functions of TGF-beta-exposed plasmacytoid dendritic cells. *Crit*  
781 *Rev Immunol* 32, 529-553.

782 Salio, M., Palmowski, M.J., Atzberger, A., Hermans, I.F., and Cerundolo, V. (2004). CpG-matured  
783 murine plasmacytoid dendritic cells are capable of in vivo priming of functional CD8 T cell responses  
784 to endogenous but not exogenous antigens. *J Exp Med* 199, 567-579.

785 Sasaki, I., Hoshino, K., Sugiyama, T., Yamazaki, C., Yano, T., Iizuka, A., Hemmi, H., Tanaka, T.,  
786 Saito, M., Sugiyama, M., *et al.* (2012). Spi-B is critical for plasmacytoid dendritic cell function and  
787 development. *Blood* 120, 4733-4743.

788 Sawai, C.M., Sisirak, V., Ghosh, H.S., Hou, E.Z., Ceribelli, M., Staudt, L.M., and Reizis, B. (2013).  
789 Transcription factor Runx2 controls the development and migration of plasmacytoid dendritic cells. *J*  
790 *Exp Med* 210, 2151-2159.

791 Scheu, S., Dresing, P., and Locksley, R.M. (2008). Visualization of IFNbeta production by  
792 plasmacytoid versus conventional dendritic cells under specific stimulation conditions in vivo. *Proc*  
793 *Natl Acad Sci U S A* 105, 20416-20421.

794 Serebreni, L., and Stark, A. (2020). Insights into gene regulation: From regulatory genomic elements  
795 to DNA-protein and protein-protein interactions. *Curr Opin Cell Biol* 70, 58-66.

- 796 Shaulian, E., and Karin, M. (2002). AP-1 as a regulator of cell life and death. *Nat Cell Biol* 4, E131-  
797 136.
- 798 Silver, A.C., Arjona, A., Walker, W.E., and Fikrig, E. (2012). The circadian clock controls toll-like  
799 receptor 9-mediated innate and adaptive immunity. *Immunity* 36, 251-261.
- 800 Slowikowski, K. (2020). ggrepel: Automatically Position Non-Overlapping Text Labels with 'ggplot2'.
- 801 Sood, V., Sharma, K.B., Gupta, V., Saha, D., Dhapola, P., Sharma, M., Sen, U., Kitajima, S.,  
802 Chowdhury, S., Kalia, M., and Vrati, S. (2017). ATF3 negatively regulates cellular antiviral signaling  
803 and autophagy in the absence of type I interferons. *Sci Rep* 7, 8789.
- 804 Sopel, N., Graser, A., Mousset, S., and Finotto, S. (2016). The transcription factor BATF modulates  
805 cytokine-mediated responses in T cells. *Cytokine Growth Factor Rev* 30, 39-45.
- 806 Storch, K.F., Lipan, O., Leykin, I., Viswanathan, N., Davis, F.C., Wong, W.H., and Weitz, C.J. (2002).  
807 Extensive and divergent circadian gene expression in liver and heart. *Nature* 417, 78-83.
- 808 Swiecki, M., and Colonna, M. (2015). The multifaceted biology of plasmacytoid dendritic cells. *Nat*  
809 *Rev Immunol* 15, 471-485.
- 810 Takayanagi, H., Kim, S., Matsuo, K., Suzuki, H., Suzuki, T., Sato, K., Yokochi, T., Oda, H., Nakamura,  
811 K., Ida, N., *et al.* (2002). RANKL maintains bone homeostasis through c-Fos-dependent induction of  
812 interferon-beta. *Nature* 416, 744-749.
- 813 Tamura, T., Tailor, P., Yamaoka, K., Kong, H.J., Tsujimura, H., O'Shea, J.J., Singh, H., and Ozato, K.  
814 (2005). IFN regulatory factor-4 and -8 govern dendritic cell subset development and their functional  
815 diversity. *J Immunol* 174, 2573-2581.
- 816 Thorvaldsdottir, H., Robinson, J.T., and Mesirov, J.P. (2013). Integrative Genomics Viewer (IGV):  
817 high-performance genomics data visualization and exploration. *Brief Bioinform* 14, 178-192.
- 818 Tomasello, E., Naciri, K., Chelbi, R., Bessou, G., Fries, A., Gressier, E., Abbas, A., Pollet, E., Pierre,  
819 P., Lawrence, T., *et al.* (2018). Molecular dissection of plasmacytoid dendritic cell activation in vivo  
820 during a viral infection. *EMBO J* 37.
- 821 Trinchieri, G., and Santoli, D. (1978). Anti-viral activity induced by culturing lymphocytes with tumor-  
822 derived or virus-transformed cells. Enhancement of human natural killer cell activity by interferon and  
823 antagonistic inhibition of susceptibility of target cells to lysis. *J Exp Med* 147, 1314-1333.
- 824 Tsujimura, H., Nagamura-Inoue, T., Tamura, T., and Ozato, K. (2002). IFN consensus sequence  
825 binding protein/IFN regulatory factor-8 guides bone marrow progenitor cells toward the macrophage  
826 lineage. *J Immunol* 169, 1261-1269.
- 827 Uchihashi, S., Fukumoto, H., Onoda, M., Hayakawa, H., Ikushiro, S., and Sakaki, T. (2011).  
828 Metabolism of the c-Fos/activator protein-1 inhibitor T-5224 by multiple human UDP-  
829 glucuronosyltransferase isoforms. *Drug Metab Dispos* 39, 803-813.
- 830 Vandewalle, C., Van Roy, F., and Berx, G. (2009). The role of the ZEB family of transcription factors  
831 in development and disease. *Cell Mol Life Sci* 66, 773-787.
- 832 Vaquerizas, J.M., Kummerfeld, S.K., Teichmann, S.A., and Luscombe, N.M. (2009). A census of  
833 human transcription factors: function, expression and evolution. *Nat Rev Genet* 10, 252-263.
- 834 Wagner, E.F., and Eferl, R. (2005). Fos/AP-1 proteins in bone and the immune system. *Immunol Rev*  
835 208, 126-140.

836 Weiss, M.A., Ellenberger, T., Wobbe, C.R., Lee, J.P., Harrison, S.C., and Struhl, K. (1990). Folding  
837 transition in the DNA-binding domain of GCN4 on specific binding to DNA. *Nature* *347*, 575-578.  
838 Wickham, H. (2016). *ggplot2: Elegant Graphics for Data Analysis*. Springer-Verlag New York.  
839 Wingender, E., Schoeps, T., Haubrock, M., Krull, M., and Donitz, J. (2018). TFClass: expanding the  
840 classification of human transcription factors to their mammalian orthologs. *Nucleic Acids Res* *46*,  
841 D343-D347.  
842 Wu, J., Li, S., Li, T., Lv, X., Zhang, M., Zang, G., Qi, C., Liu, Y.J., Xu, L., and Chen, J. (2019). pDC  
843 Activation by TLR7/8 Ligand CL097 Compared to TLR7 Ligand IMQ or TLR9 Ligand CpG. *J Immunol*  
844 *Res* *2019*, 1749803.  
845 Wu, X., Briseno, C.G., Grajales-Reyes, G.E., Haldar, M., Iwata, A., Kretzer, N.M., Kc, W., Tussiwand,  
846 R., Higashi, Y., Murphy, T.L., and Murphy, K.M. (2016). Transcription factor Zeb2 regulates  
847 commitment to plasmacytoid dendritic cell and monocyte fate. *Proc Natl Acad Sci U S A* *113*, 14775-  
848 14780.  
849 Xie, J., Zhang, S., Hu, Y., Li, D., Cui, J., Xue, J., Zhang, G., Khachigian, L.M., Wong, J., Sun, L., and  
850 Wang, M. (2014). Regulatory roles of c-jun in H5N1 influenza virus replication and host inflammation.  
851 *Biochim Biophys Acta* *1842*, 2479-2488.  
852 Zhang, H.M., Chen, H., Liu, W., Liu, H., Gong, J., Wang, H., and Guo, A.Y. (2012). AnimalTFDB: a  
853 comprehensive animal transcription factor database. *Nucleic Acids Res* *40*, D144-149.  
854 Zhou, Q., Liu, M., Xia, X., Gong, T., Feng, J., Liu, W., Liu, Y., Zhen, B., Wang, Y., Ding, C., and Qin,  
855 J. (2017). A mouse tissue transcription factor atlas. *Nat Commun* *8*, 15089.  
856

**Figure 1**

**A**

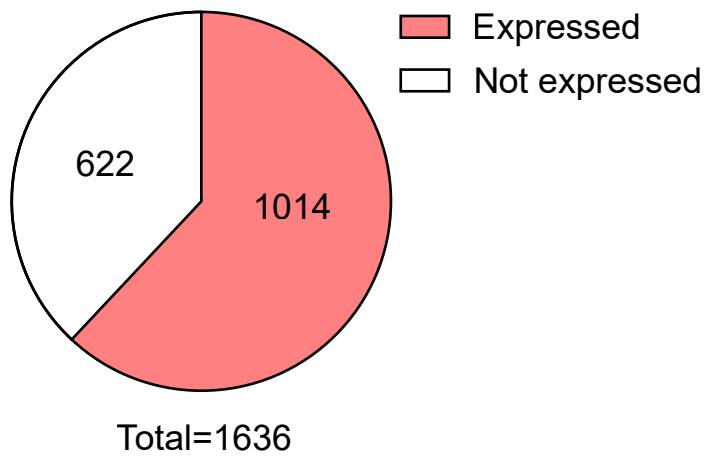

**B**

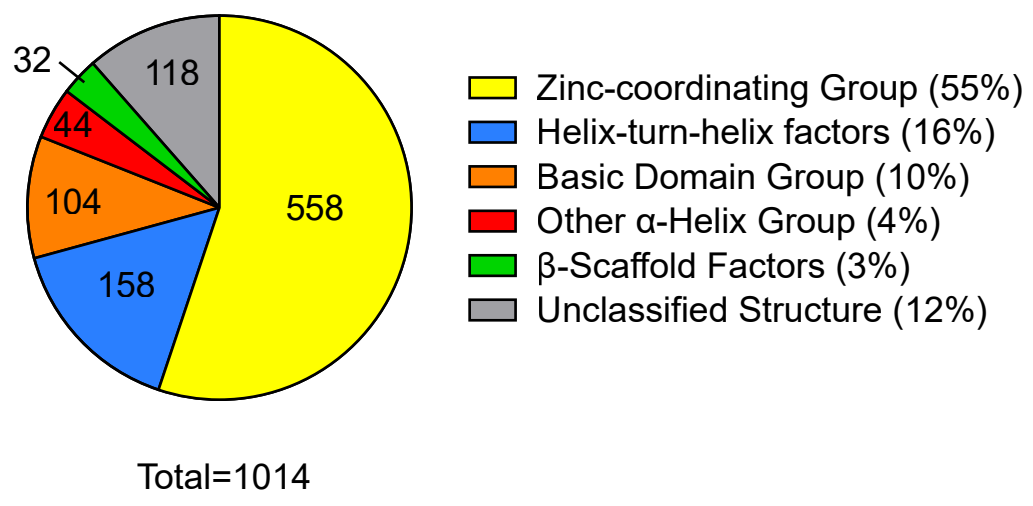

**C**

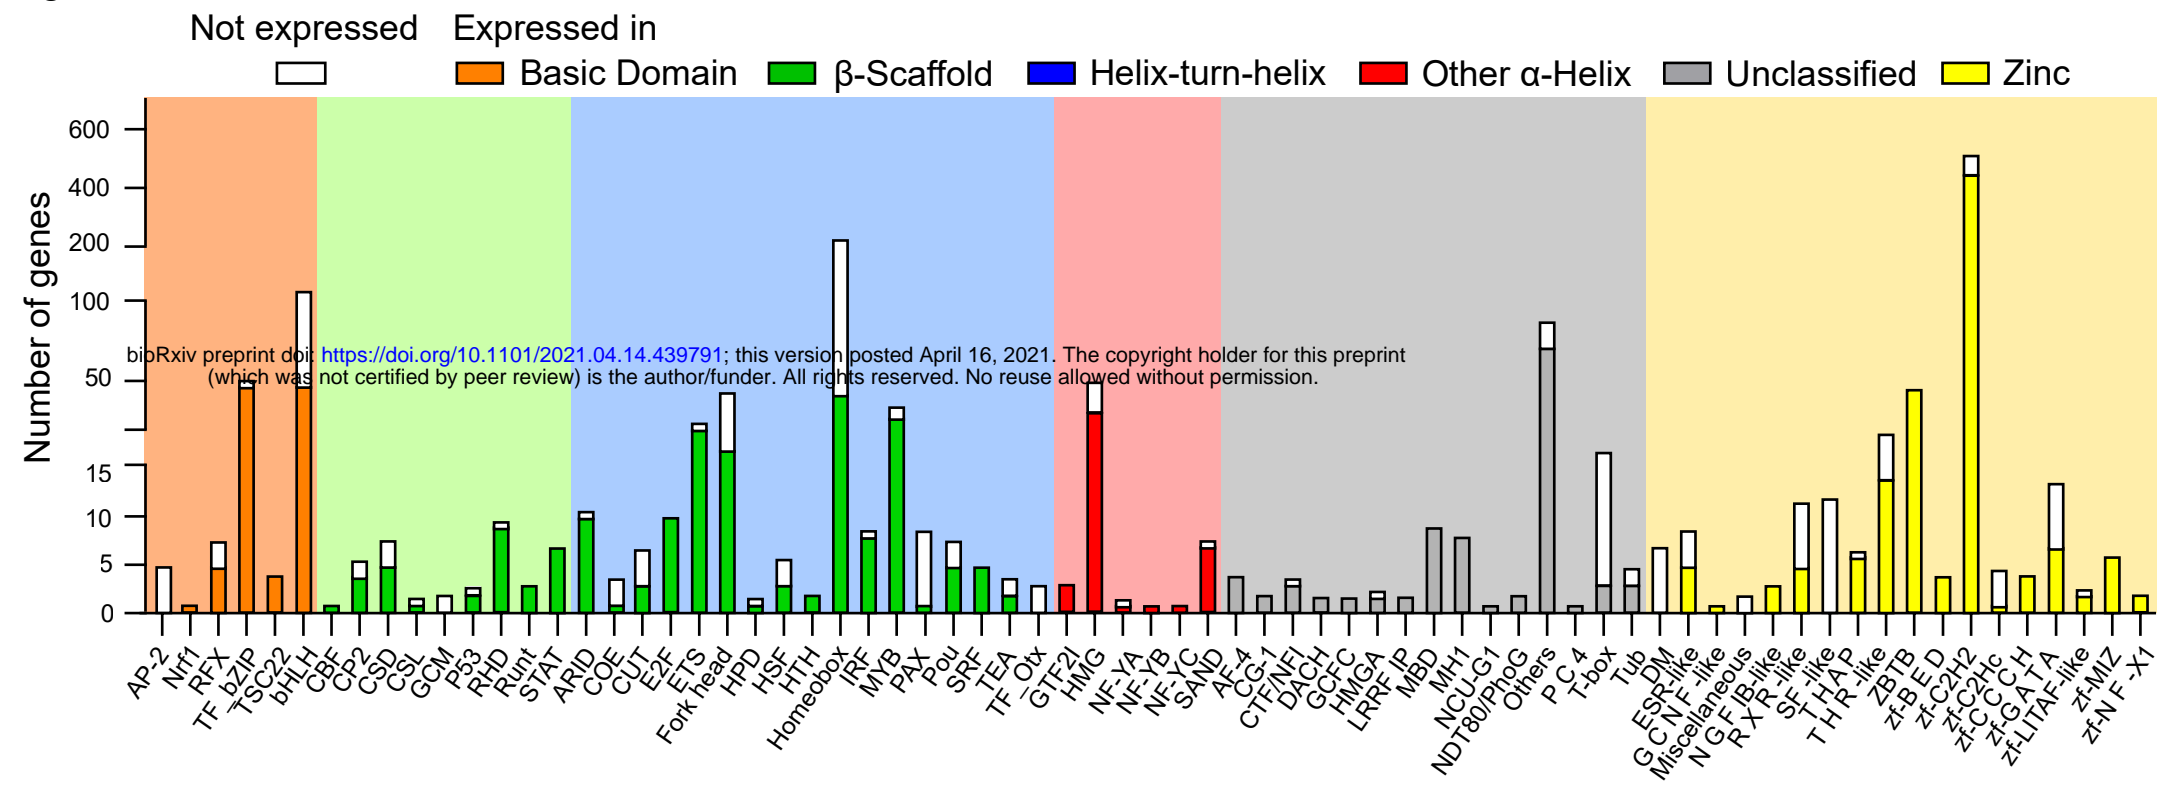

**Figure 2****A**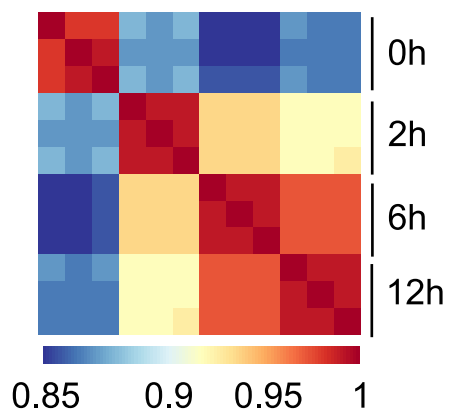**C**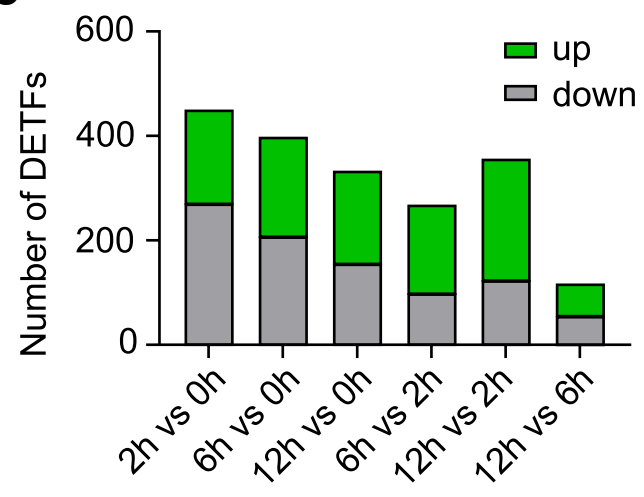**D**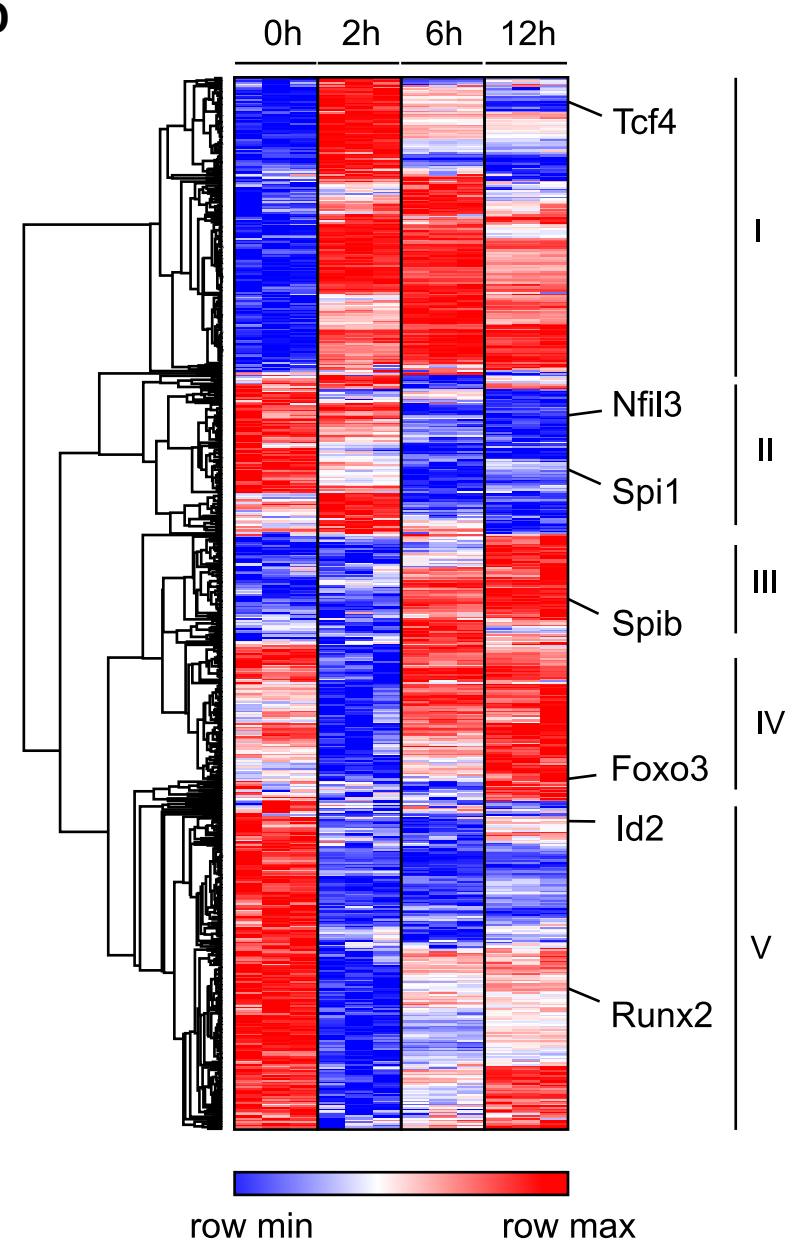**B**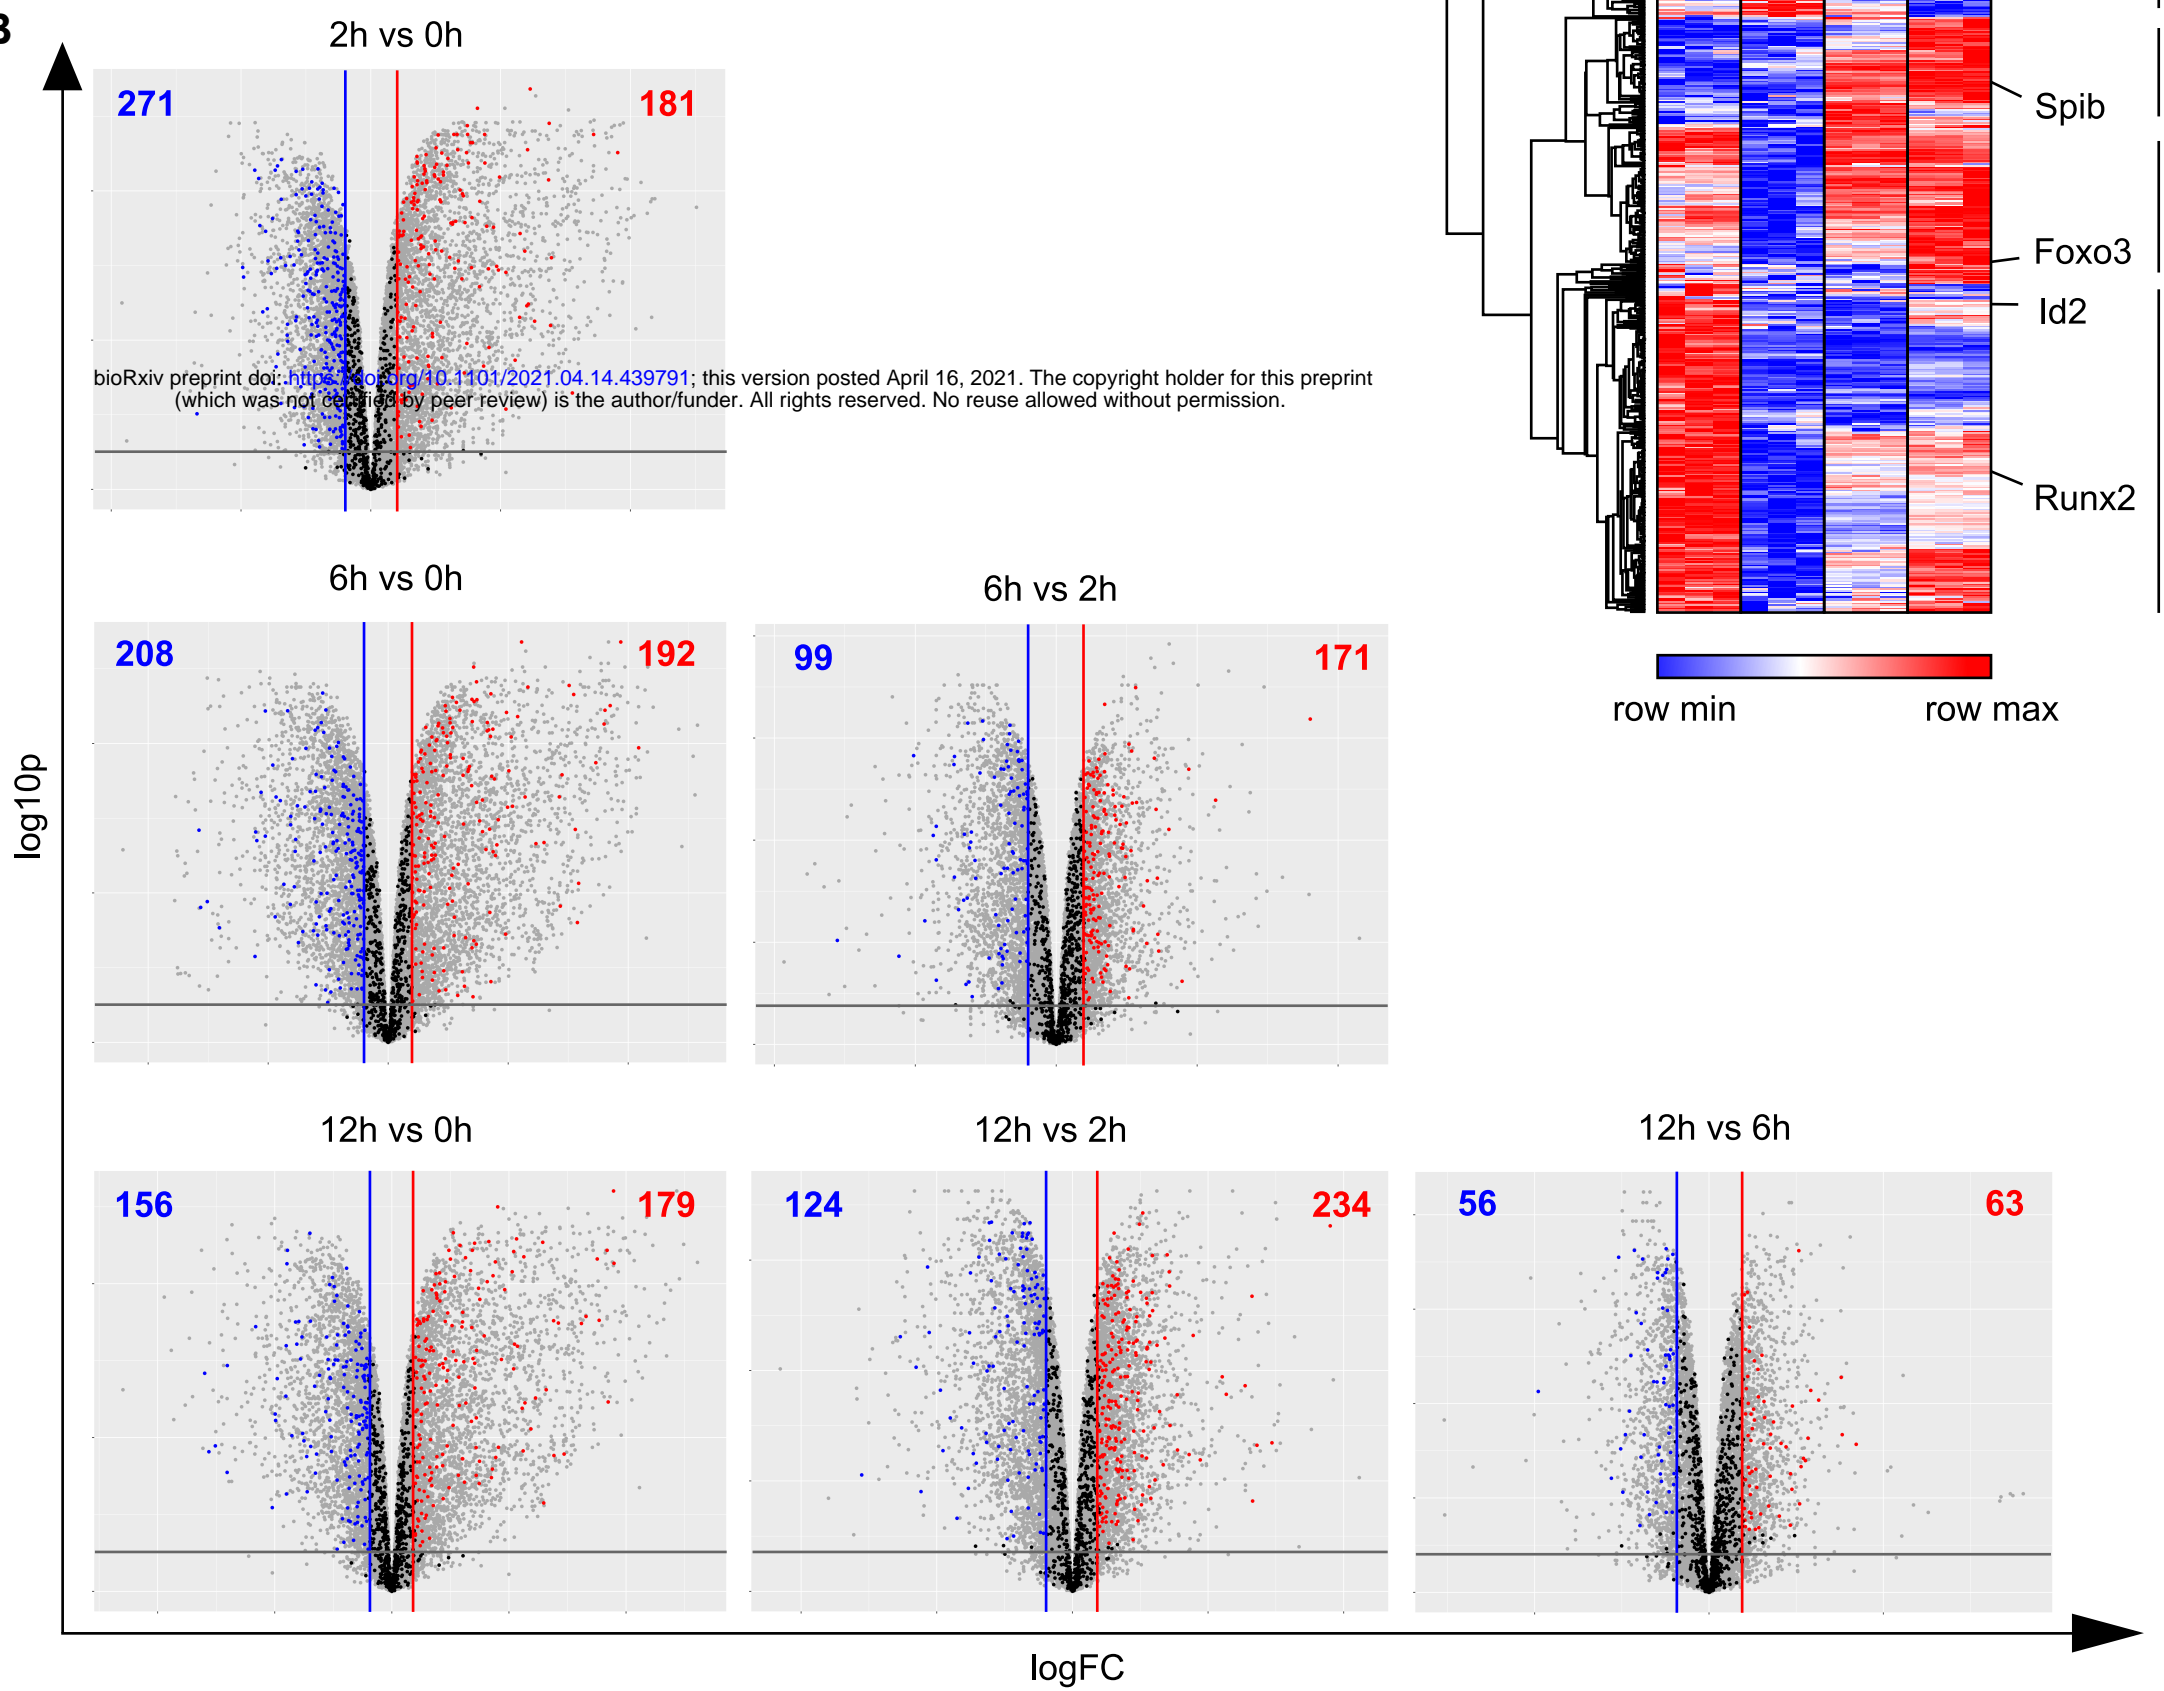



**Figure 3**

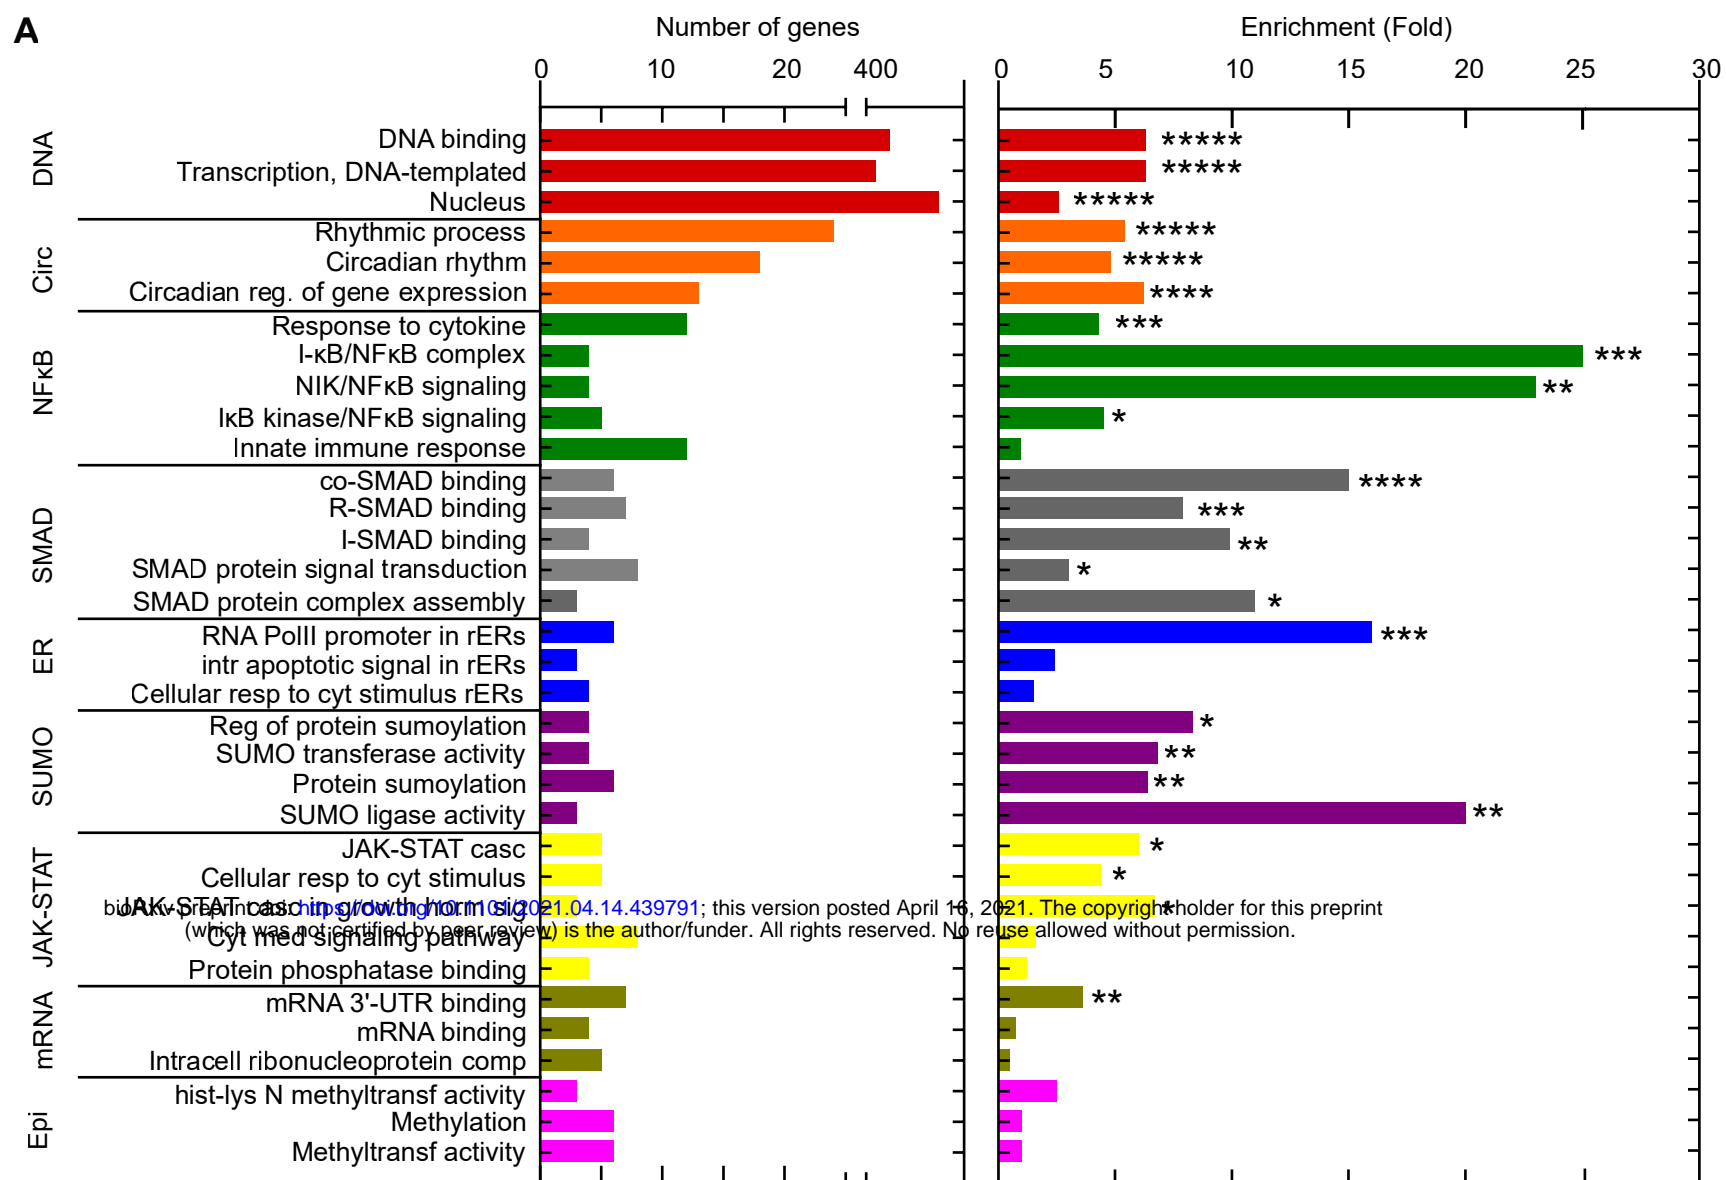

**Figure 4**

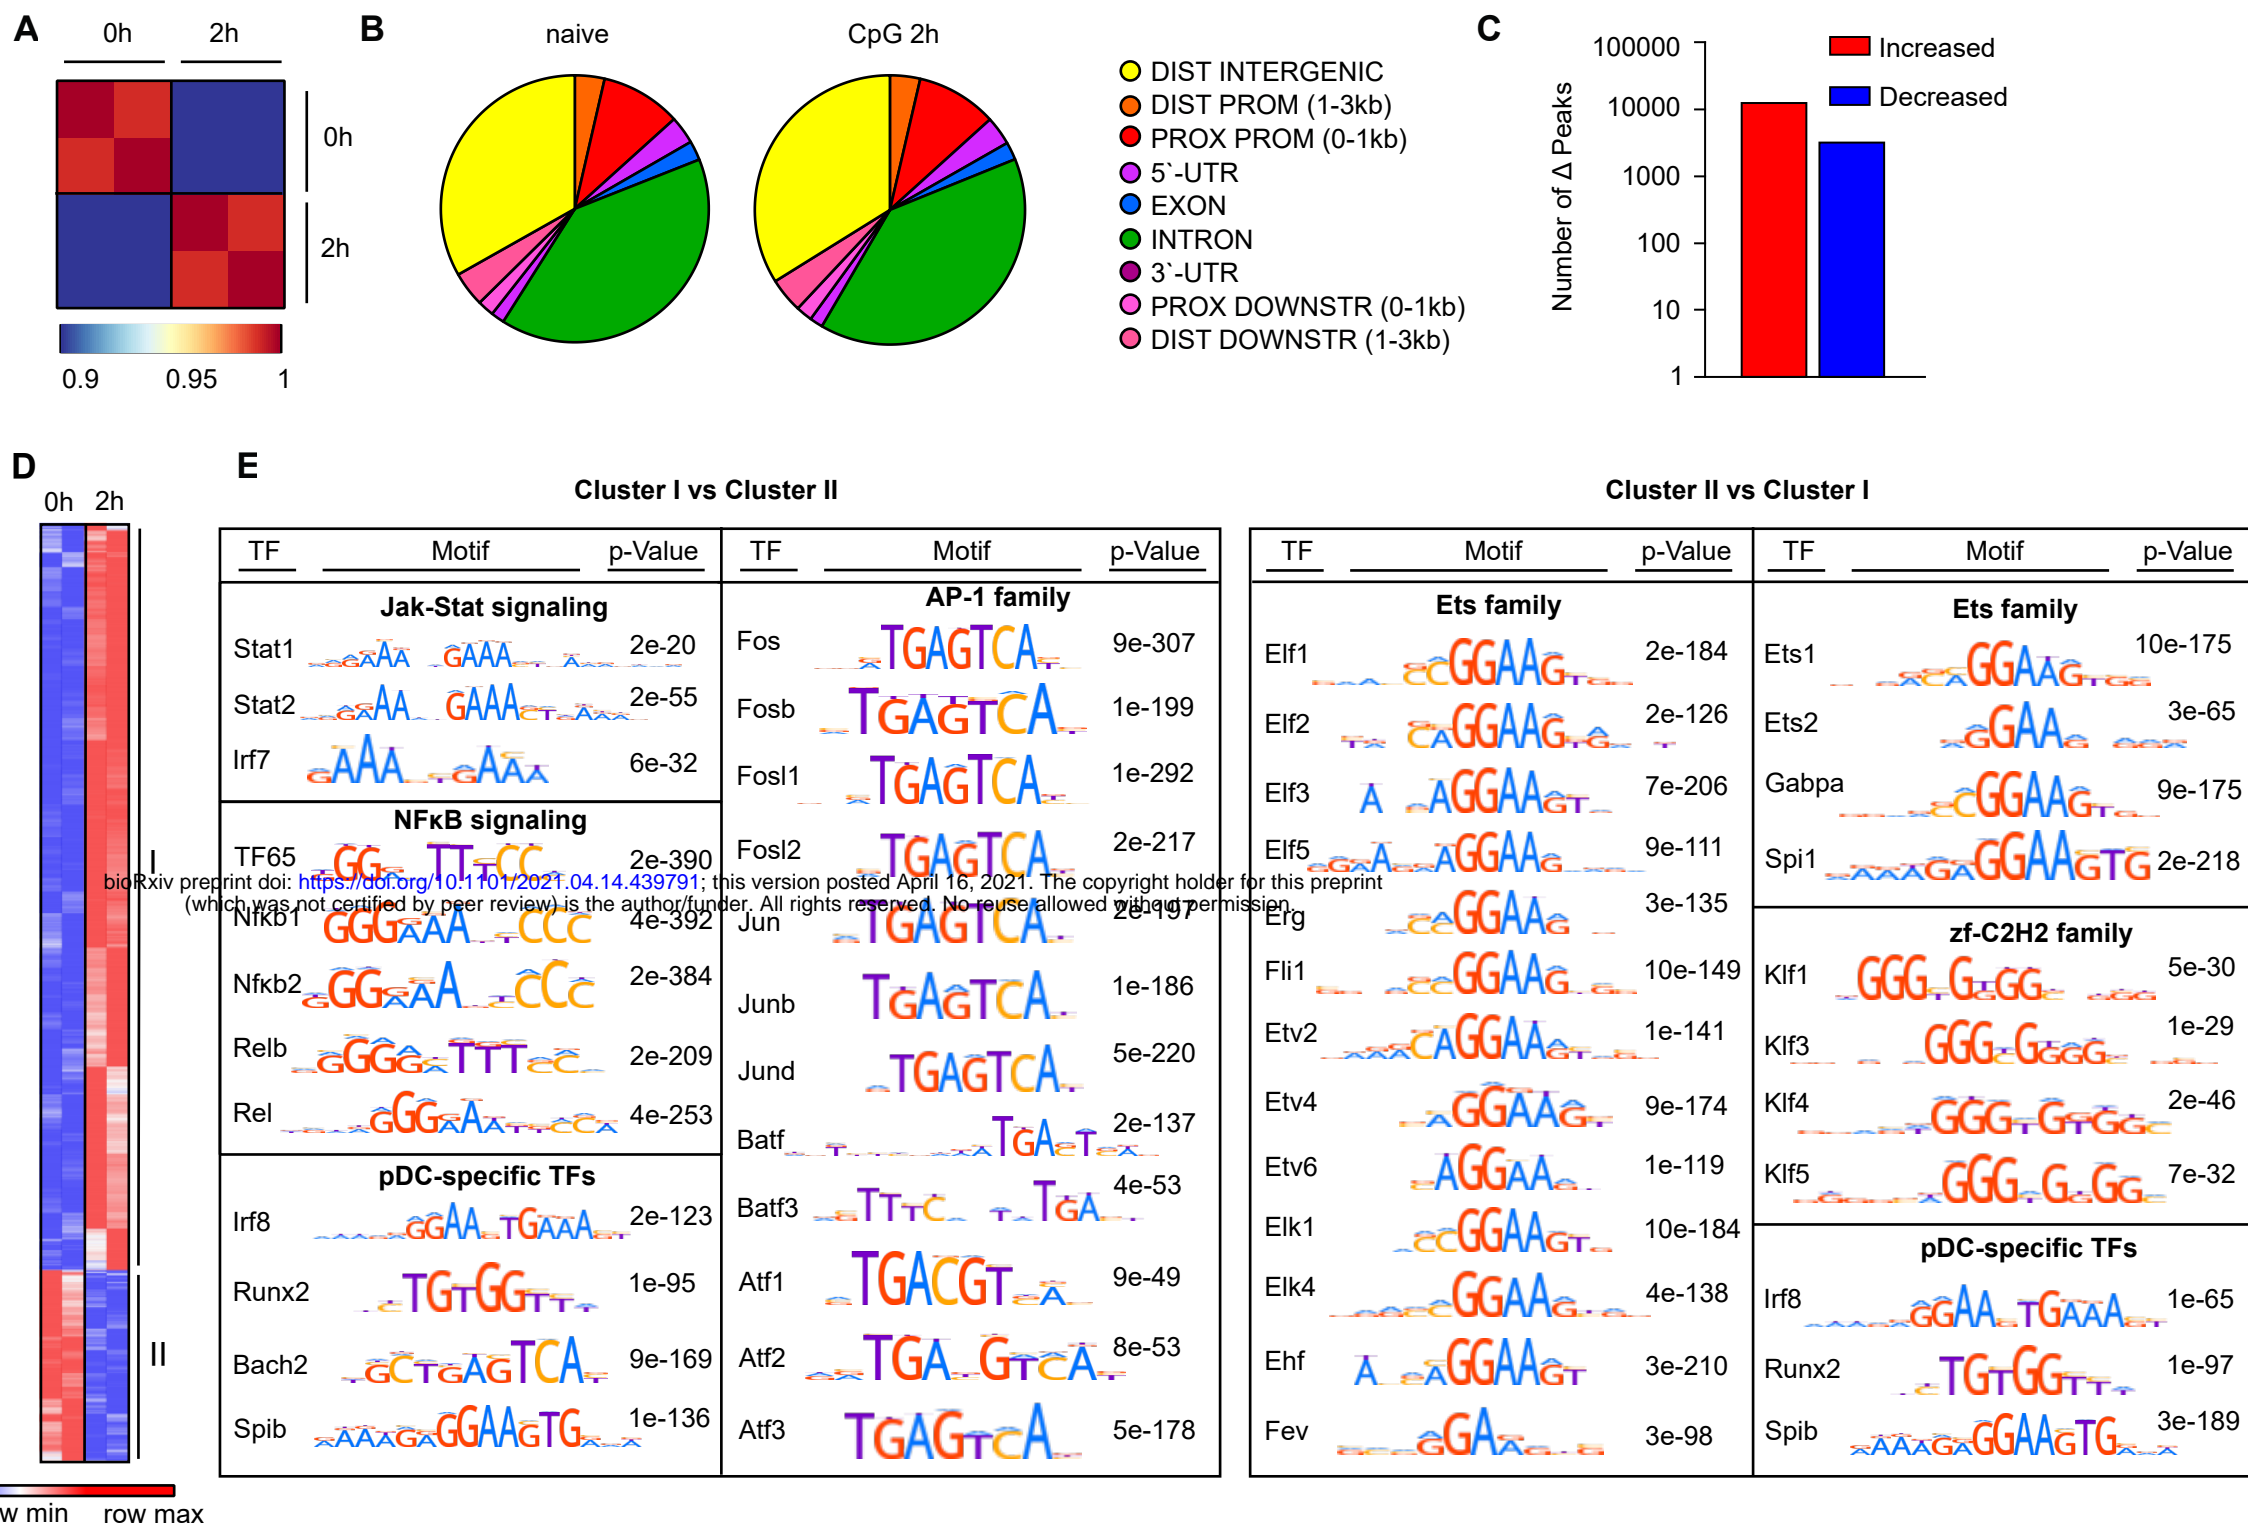

Figure 5

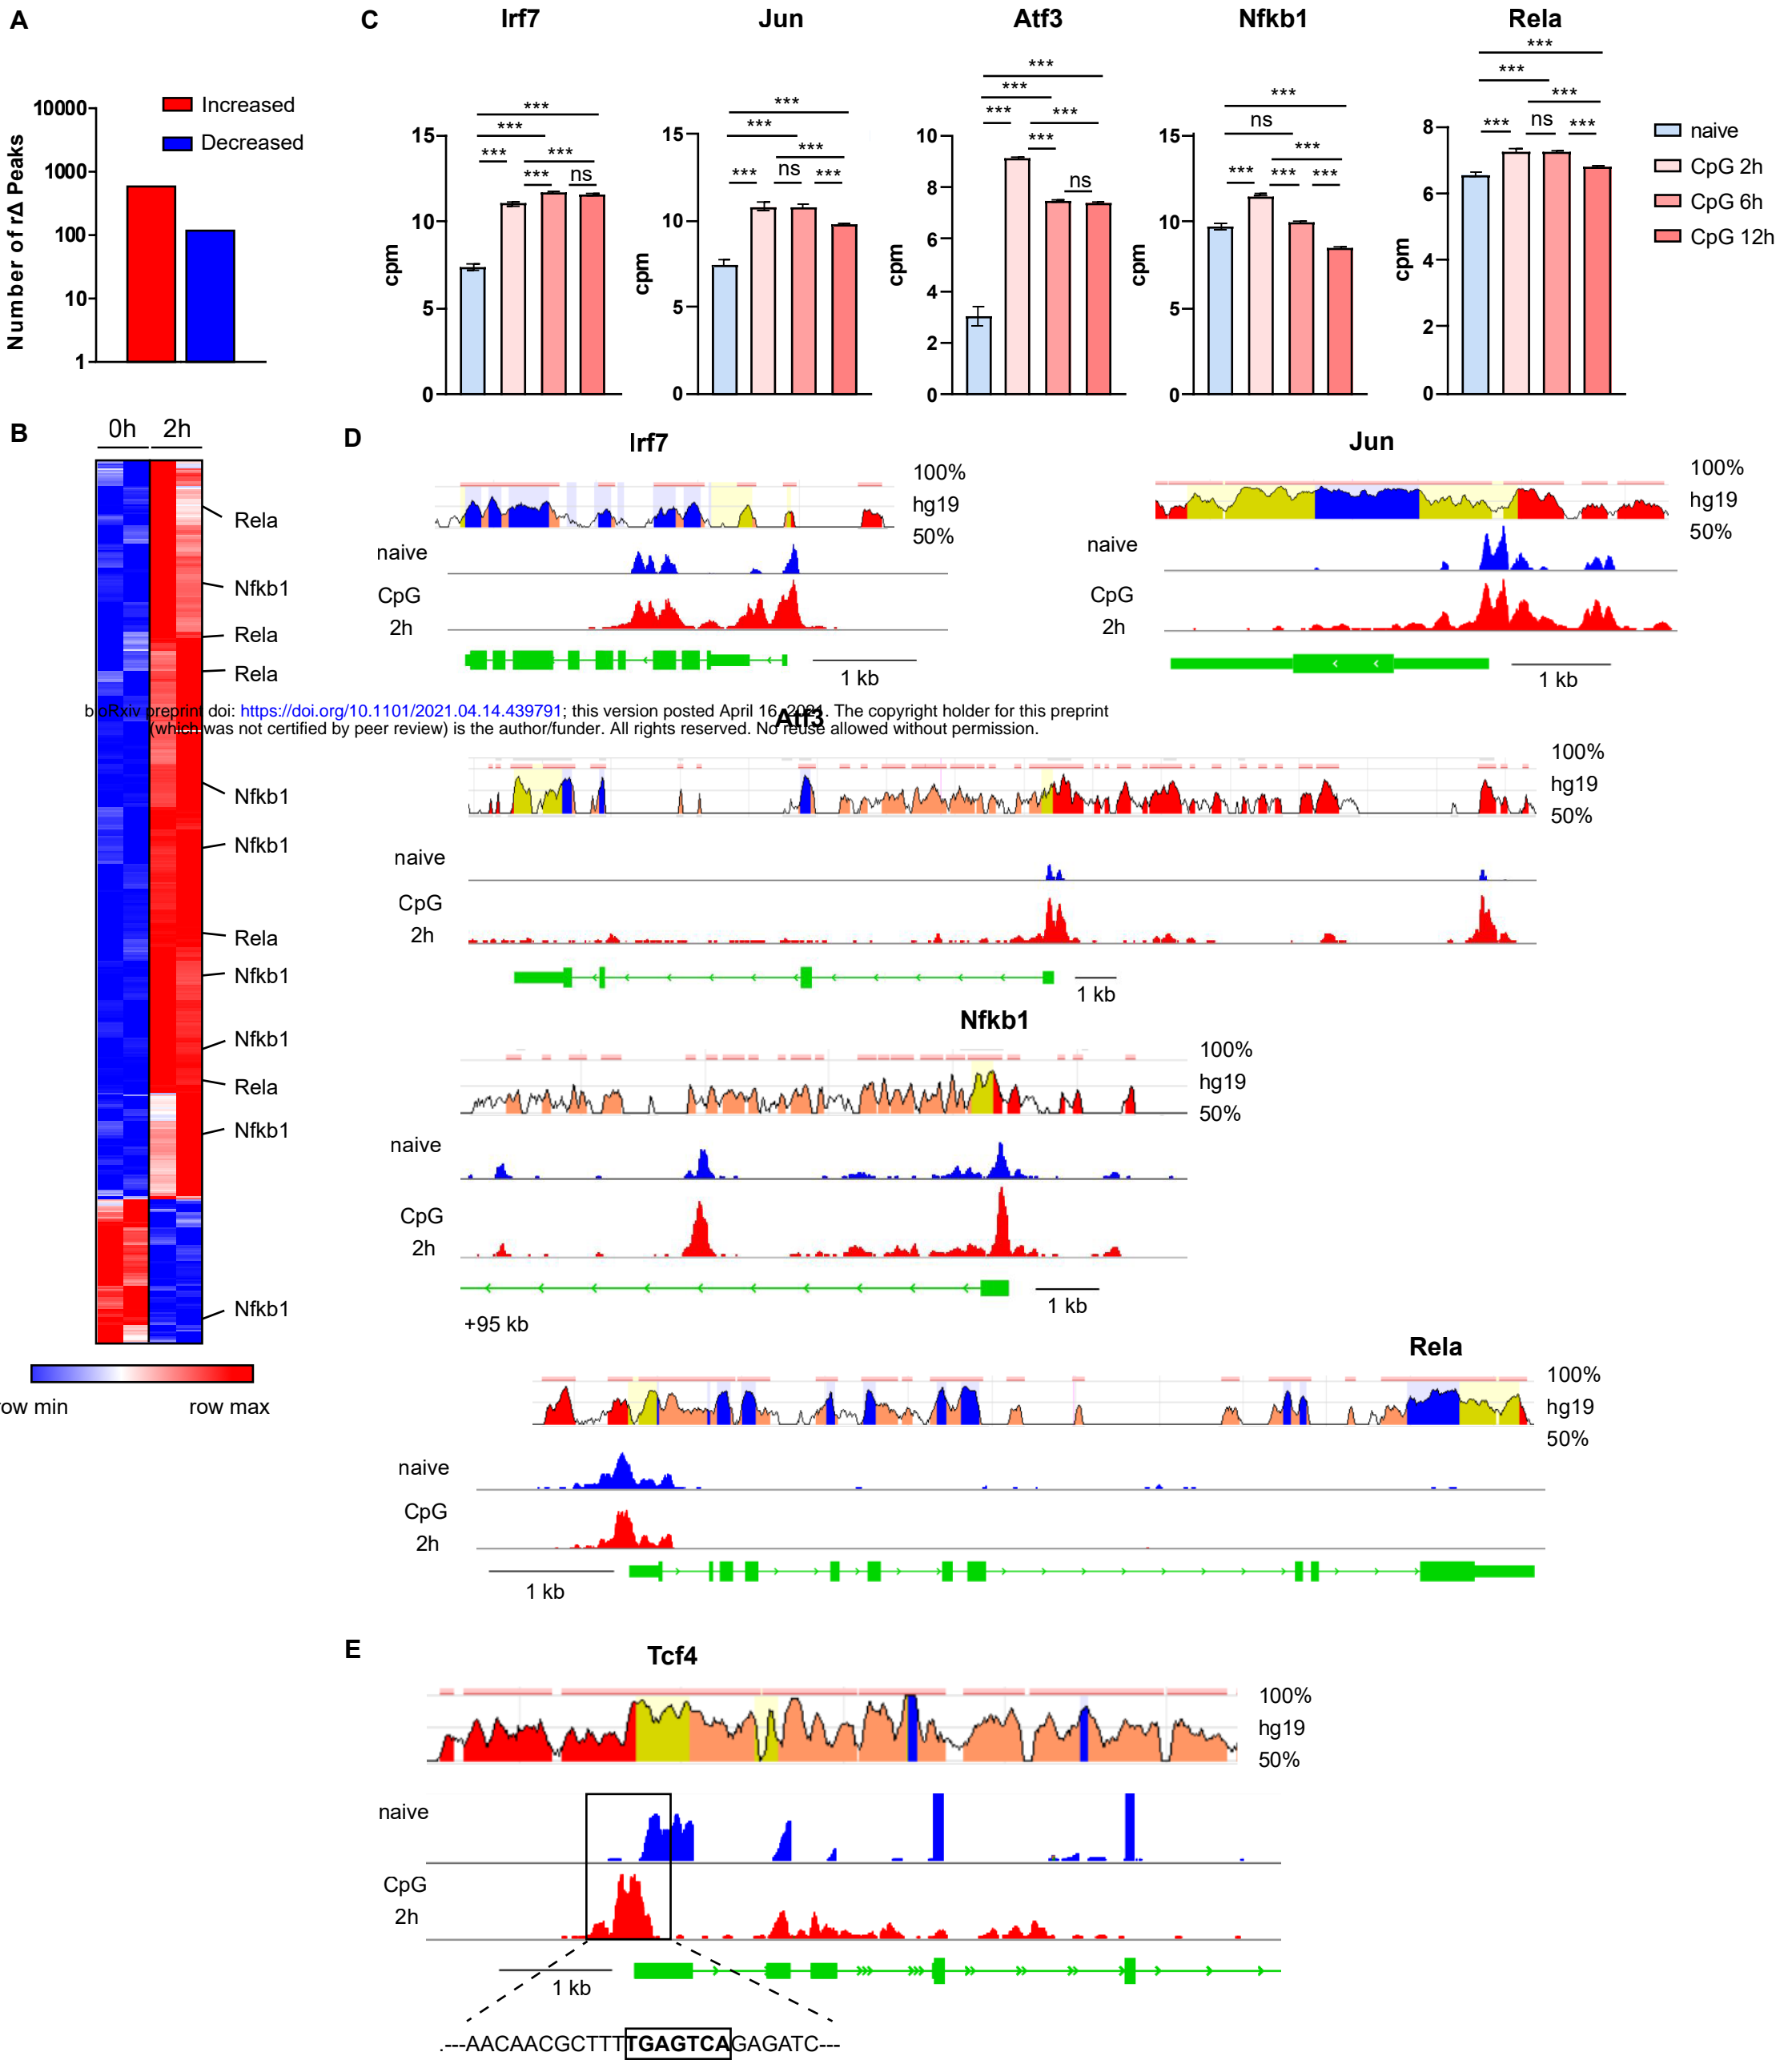

**SUPPLEMENTAL TABLE S1**

**Functional cluster analysis with 661 CpG-dependent TF genes**

| Annotation Cluster           | Enrichment Score                                         | Term | Count | %        | PValue     | Genes                                                                                       | List Total | Pop Hits | Pop Total | Fold Enrich | Bonferroni | Benjamini | FDR        |
|------------------------------|----------------------------------------------------------|------|-------|----------|------------|---------------------------------------------------------------------------------------------|------------|----------|-----------|-------------|------------|-----------|------------|
| <b>Annotation Cluster 1</b>  | 224.49086249688912                                       |      |       |          |            |                                                                                             |            |          |           |             |            |           |            |
| Category                     | Term                                                     |      | Count | %        | PValue     | Genes                                                                                       | List Total | Pop Hits | Pop Total | Fold Enrich | Bonferroni | Benjamini | FDR        |
| GOTERM_MF_DIRECT             | GO:0003677~DNA binding                                   | 644  | 431   | 65.70122 | 1.39E-273  | EHF, SPI1, BACH1, BACH2, ELK3, SPIB, SPIC, HOXA9, ZFP281, CREB3L4, SOX15, MYC, CREB3L1, GPF | 624        | 624      | 18082     | 6.34893     | 2.57E-257  | 1.29E-257 | 1.25E-257  |
| GOTERM_BP_DIRECT             | GO:0006351~transcription, DNA-templated                  | 1847 | 17446 | 6.321503 | 4.18E-271  | 2.10E-271                                                                                   | 1.70E-271  | 624      | 1885      | 18082       | 6.34893    | 2.57E-257 | 1.29E-257  |
| GOTERM_CC_DIRECT             | GO:0005634~nucleus                                       |      | 495   | 75.45732 | 1.96E-141  | EHF, SPI1,                                                                                  | 628        | 6019     | 19662     | 2.574832    | 3.58E-139  | 3.58E-139 | 3.33E-139  |
| <b>Annotation Cluster 2</b>  | 11.744756217221672                                       |      |       |          |            |                                                                                             |            |          |           |             |            |           |            |
| Category                     | Term                                                     |      | Count | %        | PValue     | Genes                                                                                       | List Total | Pop Hits | Pop Total | Fold Enrich | Bonferroni | Benjamini | FDR        |
| GOTERM_BP_DIRECT             | GO:0043401~steroid hormone mediated signaling            |      | 22    | 3.353659 | 1.48E-17   | ESRRA, RA                                                                                   | 624        | 53       | 18082     | 12.02842    | 3.07E-14   | 3.83E-15  | 3.72E-15   |
| GOTERM_MF_DIRECT             | GO:0003707~steroid hormone receptor activity             |      | 21    | 3.20122  | 3.62E-15   | ESRRA, RA                                                                                   | 644        | 56       | 17446     | 10.15877    | 1.11E-12   | 6.09E-14  | 4.94E-14   |
| GOTERM_MF_DIRECT             | GO:0004879~RNA polymerase II transcription factor        |      | 17    | 2.591463 | 3.55E-14   | THRA, VDR                                                                                   | 644        | 36       | 17446     | 12.79253    | 1.07E-11   | 5.66E-13  | 4.60E-13   |
| GOTERM_MF_DIRECT             | GO:0008270~zinc ion binding                              |      | 57    | 8.689024 | 0.00552464 | RERE, RAR                                                                                   | 644        | 1075     | 17446     | 1.436403    | 0.8123294  | 0.0309994 | 0.0251678  |
| <b>Annotation Cluster 3</b>  | 7.656034402823103                                        |      |       |          |            |                                                                                             |            |          |           |             |            |           |            |
| Category                     | Term                                                     |      | Count | %        | PValue     | Genes                                                                                       | List Total | Pop Hits | Pop Total | Fold Enrich | Bonferroni | Benjamini | FDR        |
| GOTERM_BP_DIRECT             | GO:0048511~rhythmic process                              |      | 24    | 3.658537 | 7.06E-11   | HES7, KLF1                                                                                  | 624        | 128      | 18082     | 5.433293    | 1.46E-07   | 1.33E-08  | 1.29E-08   |
| GOTERM_BP_DIRECT             | GO:0007623~circadian rhythm                              |      | 18    | 2.743902 | 1.63E-07   | KLF10, JUN                                                                                  | 624        | 108      | 18082     | 4.829594    | 3.38E-04   | 1.99E-05  | 1.93E-05   |
| GOTERM_BP_DIRECT             | GO:0032922~circadian regulation of gene expression       |      | 13    | 1.981707 | 9.35E-07   | ZFH3, BH                                                                                    | 624        | 61       | 18082     | 6.175546    | 0.0019372  | 1.02E-04  | 9.91E-05   |
| <b>Annotation Cluster 4</b>  | 2.5280383426155817                                       |      |       |          |            |                                                                                             |            |          |           |             |            |           |            |
| Category                     | Term                                                     |      | Count | %        | PValue     | Genes                                                                                       | List Total | Pop Hits | Pop Total | Fold Enrich | Bonferroni | Benjamini | FDR        |
| GOTERM_BP_DIRECT             | GO:0034097~response to cytokine                          |      | 12    | 1.829268 | 1.01E-04   | FOSL1, JUN                                                                                  | 624        | 81       | 18082     | 4.292972    | 0.1887868  | 0.0065348 | 0.0063487  |
| GOTERM_CC_DIRECT             | GO:0033256~I-kappaB/NF-kappaB complex                    |      | 4     | 0.609756 | 3.08E-04   | REL, NFKB                                                                                   | 628        | 5        | 19662     | 25.04713    | 0.0547449  | 0.0056292 | 0.0052293  |
| GOTERM_BP_DIRECT             | GO:0038061~Nik/NF-kappaB signaling                       |      | 4     | 0.609756 | 3.86E-04   | REL, NFKB                                                                                   | 624        | 5        | 18082     | 23.18205    | 0.0512363  | 0.0186213 | 0.0180911  |
| GOTERM_BP_DIRECT             | GO:0007249~I-kappaB kinase/NF-kappaB signaling           |      | 5     | 0.762195 | 0.0233617  | IRF1, REL, I                                                                                | 624        | 32       | 18082     | 4.527744    | 1.0        | 0.3457532 | 0.33590789 |
| GOTERM_BP_DIRECT             | GO:0045087~innate immune response                        |      | 12    | 1.829268 | 0.81701294 | SP110, IRF                                                                                  | 624        | 400      | 18082     | 0.869327    | 1          | 1         | 0.97199421 |
| <b>Annotation Cluster 5</b>  | 2.4533584885560358                                       |      |       |          |            |                                                                                             |            |          |           |             |            |           |            |
| Category                     | Term                                                     |      | Count | %        | PValue     | Genes                                                                                       | List Total | Pop Hits | Pop Total | Fold Enrich | Bonferroni | Benjamini | FDR        |
| GOTERM_BP_DIRECT             | GO:1902895~positive regulation of pri-miRNA tran         |      | 8     | 1.219512 | 6.05E-06   | SMAD1, JUN                                                                                  | 624        | 22       | 18082     | 10.5373     | 0.0124634  | 5.97E-04  | 5.80E-04   |
| GOTERM_MF_DIRECT             | GO:0070410~co-SMAD binding                               |      | 6     | 0.914634 | 2.57E-05   | SMAD2, TCF                                                                                  | 644        | 11       | 17446     | 14.7764     | 0.0077362  | 2.16E-04  | 1.76E-04   |
| GOTERM_MF_DIRECT             | GO:0070412~R-SMAD binding                                |      | 7     | 1.067073 | 1.87E-04   | SMAD2, ZNF                                                                                  | 644        | 24       | 17446     | 7.901268    | 0.0548194  | 0.0013795 | 0.0012001  |
| GOTERM_BP_DIRECT             | GO:0011657~ureteric bud development                      |      | 8     | 1.219512 | 0.00120144 | SMAD2, SM                                                                                   | 624        | 48       | 18082     | 4.829594    | 0.9172627  | 0.0469695 | 0.04563209 |
| GOTERM_BP_DIRECT             | GO:0007179~transforming growth factor beta receptor      |      | 9     | 1.371951 | 0.00420828 | SMAD2, SM                                                                                   | 624        | 75       | 18082     | 3.477308    | 0.9998403  | 0.1171341 | 0.11379869 |
| GOTERM_MF_DIRECT             | GO:0070411~I-SMAD binding                                |      | 4     | 0.609756 | 0.00658823 | SMAD2, SM                                                                                   | 644        | 11       | 17446     | 9.850932    | 0.8641533  | 0.0352692 | 0.02863444 |
| GOTERM_BP_DIRECT             | GO:0009880~embryonic pattern specification               |      | 5     | 0.762195 | 0.00856577 | SMAD2, SM                                                                                   | 624        | 24       | 18082     | 6.036993    | 1          | 0.1888113 | 0.18343496 |
| GOTERM_BP_DIRECT             | GO:0060395~SMAD protein signal transduction              |      | 8     | 1.219512 | 0.01673176 | SMAD2, SM                                                                                   | 624        | 77       | 18082     | 3.010656    | 1          | 0.2988638 | 0.29035373 |
| GOTERM_BP_DIRECT             | GO:0007183~SMAD protein complex assembly                 |      | 3     | 0.457317 | 0.02891013 | SMAD2, SM                                                                                   | 624        | 8        | 18082     | 10.86659    | 1          | 0.3967006 | 0.38540459 |
| GOTERM_MF_DIRECT             | GO:0034713~type I transforming growth factor beta        |      | 3     | 0.457317 | 0.05016191 | SMAD2, SM                                                                                   | 644        | 10       | 17446     | 8.127019    | 0.9999998  | 0.2140712 | 0.17380041 |
| GOTERM_MF_DIRECT             | GO:0046332~SMAD binding                                  |      | 5     | 0.762195 | 0.13076376 | SMAD2, SM                                                                                   | 644        | 53       | 17446     | 2.555666    | 1          | 0.4891533 | 0.39713439 |
| GOTERM_BP_DIRECT             | GO:0017015~regulation of transforming growth factor      |      | 3     | 0.457317 | 0.13799761 | SMAD2, SM                                                                                   | 624        | 19       | 18082     | 4.575405    | 1          | 0.9725546 | 0.94486121 |
| <b>Annotation Cluster 6</b>  | 1.8310626466925868                                       |      |       |          |            |                                                                                             |            |          |           |             |            |           |            |
| Category                     | Term                                                     |      | Count | %        | PValue     | Genes                                                                                       | List Total | Pop Hits | Pop Total | Fold Enrich | Bonferroni | Benjamini | FDR        |
| GOTERM_BP_DIRECT             | GO:1990440~positive regulation of transcription factor   |      | 6     | 0.914634 | 1.86E-05   | CEBPB, CR                                                                                   | 624        | 11       | 18082     | 15.80594    | 0.0377754  | 0.0014803 | 0.00143817 |
| GOTERM_BP_DIRECT             | GO:0070059~intrinsic apoptotic signaling pathway         |      | 3     | 0.457317 | 0.35347399 | CEBPB, DD                                                                                   | 624        | 36       | 18082     | 2.414797    | 1          | 1         | 0.97199421 |
| GOTERM_BP_DIRECT             | GO:0034976~response to endoplasmic reticulum stress      |      | 4     | 0.609756 | 0.48923142 | CEBPB, DD                                                                                   | 624        | 76       | 18082     | 1.525135    | 1          | 1         | 0.97199421 |
| <b>Annotation Cluster 7</b>  | 1.6923550652467598                                       |      |       |          |            |                                                                                             |            |          |           |             |            |           |            |
| Category                     | Term                                                     |      | Count | %        | PValue     | Genes                                                                                       | List Total | Pop Hits | Pop Total | Fold Enrich | Bonferroni | Benjamini | FDR        |
| GOTERM_BP_DIRECT             | GO:0016925~protein sumoylation                           |      | 6     | 0.914634 | 0.0020548  | PIAS4, PIAS1                                                                                | 624        | 27       | 18082     | 6.439459    | 0.985934   | 0.069796  | 0.06780855 |
| GOTERM_MF_DIRECT             | GO:0061665~SUMO ligase activity                          |      | 3     | 0.457317 | 0.00774499 | PIAS4, PIAS1                                                                                | 644        | 4        | 17446     | 20.31755    | 0.9044488  | 0.0404609 | 0.03284945 |
| GOTERM_BP_DIRECT             | GO:0033235~positive regulation of protein sumoylation    |      | 4     | 0.609756 | 0.01115387 | PIAS4, PIAS1                                                                                | 624        | 14       | 18082     | 8.279304    | 1          | 0.2265766 | 0.22012486 |
| GOTERM_MF_DIRECT             | GO:0019789~SUMO transferase activity                     |      | 4     | 0.609756 | 0.01950048 | PIAS4, PIAS1                                                                                | 644        | 16       | 17446     | 6.772516    | 0.9973872  | 0.0909022 | 0.07380181 |
| GOTERM_MF_DIRECT             | GO:0016874~ligase activity                               |      | 6     | 0.914634 | 0.99761374 | PIAS4, PIAS1                                                                                | 644        | 362      | 17446     | 0.449007    | 1          | 1         | 0.99761374 |
| <b>Annotation Cluster 8</b>  | 1.4823485732155635                                       |      |       |          |            |                                                                                             |            |          |           |             |            |           |            |
| Category                     | Term                                                     |      | Count | %        | PValue     | Genes                                                                                       | List Total | Pop Hits | Pop Total | Fold Enrich | Bonferroni | Benjamini | FDR        |
| GOTERM_MF_DIRECT             | GO:0035497~cAMP response element binding                 |      | 6     | 0.914634 | 6.74E-05   | JUN, CREB                                                                                   | 644        | 13       | 17446     | 12.50311    | 0.0201379  | 5.23E-04  | 4.25E-04   |
| GOTERM_BP_DIRECT             | GO:0030968~endoplasmic reticulum unfolded protein        |      | 7     | 1.067073 | 0.00585734 | CREB3L4, CREB1                                                                              | 624        | 48       | 18082     | 4.225895    | 0.9999949  | 0.1498322 | 0.14556576 |
| GOTERM_BP_DIRECT             | GO:0006986~response to unfolded protein                  |      | 5     | 0.762195 | 0.09820951 | CREB3L4, CREB1                                                                              | 624        | 51       | 18082     | 2.840938    | 1          | 0.8145034 | 0.79131049 |
| GOTERM_CC_DIRECT             | GO:0005789~endoplasmic reticulum membrane                |      | 4     | 0.609756 | 0.99999998 | CREB3L4, CREB1                                                                              | 628        | 710      | 19662     | 0.176388    | 1          | 1         | 0.99999998 |
| GOTERM_CC_DIRECT             | GO:0005783~endoplasmic reticulum                         |      | 8     | 1.219512 | 1          | CREB3L4, CREB1                                                                              | 628        | 1323     | 19662     | 0.189321    | 1          | 1         | 1          |
| <b>Annotation Cluster 9</b>  | 1.3953787168799636                                       |      |       |          |            |                                                                                             |            |          |           |             |            |           |            |
| Category                     | Term                                                     |      | Count | %        | PValue     | Genes                                                                                       | List Total | Pop Hits | Pop Total | Fold Enrich | Bonferroni | Benjamini | FDR        |
| GOTERM_BP_DIRECT             | GO:0044344~cellular response to fibroblast growth factor |      | 5     | 0.762195 | 0.01878653 | NR4A1, EG                                                                                   | 624        | 30       | 18082     | 4.829594    | 1          | 0.3217    | 0.31253962 |
| GOTERM_BP_DIRECT             | GO:1904628~cellular response to phorbol 13-acetate       |      | 3     | 0.457317 | 0.02891013 | MYC, ZFP3                                                                                   | 624        | 8        | 18082     | 10.86659    | 1          | 0.3967006 | 0.38540459 |
| GOTERM_BP_DIRECT             | GO:0000165~MAPK cascade                                  |      | 7     | 1.067073 | 0.03136762 | SMAD1, M                                                                                    | 624        | 69       | 18082     | 2.99753     | 1          | 0.4189961 | 0.40706521 |
| GOTERM_BP_DIRECT             | GO:0009611~response to wounding                          |      | 6     | 0.914634 | 0.04905994 | HHEX, MYD                                                                                   | 624        | 58       | 18082     | 2.997679    | 1          | 0.5616143 | 0.54562242 |
| GOTERM_BP_DIRECT             | GO:0071364~cellular response to epidermal growth factor  |      | 4     | 0.609756 | 0.12618308 | MYC, ID1,                                                                                   | 624        | 36       | 18082     | 3.219729    | 1          | 0.9447928 | 0.91788988 |
| <b>Annotation Cluster 10</b> | 1.3590519762597917                                       |      |       |          |            |                                                                                             |            |          |           |             |            |           |            |
| Category                     | Term                                                     |      | Count | %        | PValue     | Genes                                                                                       | List Total | Pop Hits | Pop Total | Fold Enrich | Bonferroni | Benjamini | FDR        |
| GOTERM_BP_DIRECT             | GO:0051591~response to cAMP                              |      | 6     | 0.914634 | 0.03050679 | FOSL1, JUN                                                                                  | 624        | 51       | 18082     | 3.409125    | 1          | 0.4131377 | 0.40137367 |
| GOTERM_BP_DIRECT             | GO:0071277~cellular response to calcium ion              |      | 6     | 0.914634 | 0.03526261 | JUN, MEK2                                                                                   | 624        | 53       | 18082     | 3.280479    | 1          | 0.4566508 | 0.4436477  |
| GOTERM_BP_DIRECT             | GO:0032870~cellular response to hormone stimulus         |      | 5     | 0.762195 | 0.0778275  | NCOA1, JUN                                                                                  | 624        | 47       | 18082     | 3.08272     | 1          | 0.72639   | 0.70570614 |
| <b>Annotation Cluster 11</b> | 1.2275392798040106                                       |      |       |          |            |                                                                                             |            |          |           |             |            |           |            |
| Category                     | Term                                                     |      | Count | %        | PValue     | Genes                                                                                       | List Total | Pop Hits | Pop Total | Fold Enrich | Bonferroni | Benjamini | FDR        |
| GOTERM_BP_DIRECT             | GO:0009612~response to mechanical stimulus               |      | 7     | 1.067073 | 0.02108733 | FOSL1, JUN                                                                                  | 624        | 63       | 18082     | 3.219729    | 1          | 0.3366217 | 0.32703645 |
| GOTERM_BP_DIRECT             | GO:0051591~response to cAMP                              |      | 6     | 0.914634 | 0.03050679 | FOSL1, JUN                                                                                  | 624        | 51       | 18082     | 3.409125    | 1          | 0.4131377 | 0.40137367 |
| GOTERM_BP_DIRECT             | GO:0042542~response to hydrogen peroxide                 |      | 4     | 0.609756 | 0.32282261 | FOSL1, JUN                                                                                  | 624        | 58       | 18082     | 1.998453    | 1          | 1         | 0.97199421 |

| Annotation Cluster 12 |                                              | Enrichment Score: 1.1533564963509588 |          |            |            |            |          |           |             |            |           |            |
|-----------------------|----------------------------------------------|--------------------------------------|----------|------------|------------|------------|----------|-----------|-------------|------------|-----------|------------|
| Category              | Term                                         | Count                                | %        | PValue     | Genes      | List Total | Pop Hits | Pop Total | Fold Enrich | Bonferroni | Benjamini | FDR        |
| GOTERM_BP_DIRECT      | GO:001843~neural tube closure                | 9                                    | 1.371951 | 0.01876662 | TGIF1, RAF | 624        | 97       | 18082     | 2.68864     | 1          | 0.3217    | 0.31253962 |
| GOTERM_BP_DIRECT      | GO:0060348~bone development                  | 6                                    | 0.914634 | 0.04321059 | SMAD1, R   | 624        | 56       | 18082     | 3.104739    | 1          | 0.5329306 | 0.51775547 |
| GOTERM_BP_DIRECT      | GO:0031076~embryonic camera-type eye develop | 3                                    | 0.457317 | 0.08205379 | RARG, RAF  | 624        | 14       | 18082     | 6.209478    | 1          | 0.7427525 | 0.72160273 |
| GOTERM_BP_DIRECT      | GO:0060173~limb development                  | 3                                    | 0.457317 | 0.3660151  | RARG, RAF  | 624        | 37       | 18082     | 2.349532    | 1          | 1         | 0.97199421 |

| Annotation Cluster 13 |                                                  | Enrichment Score: 0.9360546220269985 |          |            |            |            |          |           |             |            |           |            |
|-----------------------|--------------------------------------------------|--------------------------------------|----------|------------|------------|------------|----------|-----------|-------------|------------|-----------|------------|
| Category              | Term                                             | Count                                | %        | PValue     | Genes      | List Total | Pop Hits | Pop Total | Fold Enrich | Bonferroni | Benjamini | FDR        |
| GOTERM_BP_DIRECT      | GO:0007259~JAK-STAT cascade                      | 5                                    | 0.762195 | 0.00856577 | STAT5A, PI | 624        | 24       | 18082     | 6.036993    | 1          | 0.1888113 | 0.18343496 |
| GOTERM_BP_DIRECT      | GO:0071345~cellular response to cytokine stimulu | 5                                    | 0.762195 | 0.02588086 | STAT5A, PI | 624        | 33       | 18082     | 4.39054     | 1          | 0.368523  | 0.3580293  |
| GOTERM_BP_DIRECT      | GO:0060397~JAK-STAT cascade involved in growth   | 3                                    | 0.457317 | 0.07192523 | STAT5A, S1 | 624        | 13       | 18082     | 6.68713     | 1          | 0.6867699 | 0.66721423 |
| GOTERM_BP_DIRECT      | GO:0019221~cytokine-mediated signaling pathway   | 8                                    | 1.219512 | 0.23911635 | STAT5A, CI | 624        | 146      | 18082     | 1.587812    | 1          | 1         | 0.97199421 |
| GOTERM_MF_DIRECT      | GO:0019903~protein phosphatase binding           | 4                                    | 0.609756 | 0.6345088  | STAT5A, S1 | 644        | 88       | 17446     | 1.231366    | 1          | 1         | 0.81456954 |
| GOTERM_MF_DIRECT      | GO:0004871~signal transducer activity            | 7                                    | 1.067073 | 0.99999809 | STAT5A, S1 | 644        | 648      | 17446     | 0.29264     | 1          | 1         | 0.99999809 |

| Annotation Cluster 14 |                                                 | Enrichment Score: 0.6460632072222745 |          |            |            |            |          |           |             |            |           |            |
|-----------------------|-------------------------------------------------|--------------------------------------|----------|------------|------------|------------|----------|-----------|-------------|------------|-----------|------------|
| Category              | Term                                            | Count                                | %        | PValue     | Genes      | List Total | Pop Hits | Pop Total | Fold Enrich | Bonferroni | Benjamini | FDR        |
| GOTERM_MF_DIRECT      | GO:0003730~mRNA 3'-UTR binding                  | 7                                    | 1.067073 | 0.01292527 | CARHSP1,   | 644        | 53       | 17446     | 3.577933    | 0.9803343  | 0.063167  | 0.05128414 |
| GOTERM_MF_DIRECT      | GO:0003729~mRNA binding                         | 4                                    | 0.609756 | 0.89902274 | CPEB1, ME  | 644        | 142      | 17446     | 0.7631      | 1          | 1         | 0.89902274 |
| GOTERM_CC_DIRECT      | GO:0030529~intracellular ribonucleoprotein comp | 5                                    | 0.762195 | 0.9922019  | CPEB1, NF, | 628        | 320      | 19662     | 0.489202    | 1          | 1         | 0.9922019  |

| Annotation Cluster 15 |                                                 | Enrichment Score: 0.18670644339195458 |          |            |           |            |          |           |             |            |           |            |
|-----------------------|-------------------------------------------------|---------------------------------------|----------|------------|-----------|------------|----------|-----------|-------------|------------|-----------|------------|
| Category              | Term                                            | Count                                 | %        | PValue     | Genes     | List Total | Pop Hits | Pop Total | Fold Enrich | Bonferroni | Benjamini | FDR        |
| GOTERM_MF_DIRECT      | GO:0018024~histone-lysine N-methyltransferase a | 3                                     | 0.457317 | 0.34474797 | PRDM9, KI | 644        | 33       | 17446     | 2.462733    | 1          | 1         | 0.81456954 |
| GOTERM_BP_DIRECT      | GO:0032259~methylation                          | 6                                     | 0.914634 | 0.69625626 | PRDM9, KI | 624        | 169      | 18082     | 1.028789    | 1          | 1         | 0.97199421 |
| GOTERM_MF_DIRECT      | GO:0008168~methyltransferase activity           | 6                                     | 0.914634 | 0.74628275 | PRDM9, KI | 644        | 168      | 17446     | 0.967502    | 1          | 1         | 0.81456954 |
| GOTERM_MF_DIRECT      | GO:0016740~transferase activity                 | 9                                     | 1.371951 | 1          | NCOA1, PF | 644        | 1472     | 17446     | 0.165632    | 1          | 1         | 1          |

| Annotation Cluster 16 |                                         | Enrichment Score: 0.04973056863696993 |          |            |            |            |          |           |             |            |           |            |
|-----------------------|-----------------------------------------|---------------------------------------|----------|------------|------------|------------|----------|-----------|-------------|------------|-----------|------------|
| Category              | Term                                    | Count                                 | %        | PValue     | Genes      | List Total | Pop Hits | Pop Total | Fold Enrich | Bonferroni | Benjamini | FDR        |
| GOTERM_BP_DIRECT      | GO:0030030~cell projection organization | 5                                     | 0.762195 | 0.76842612 | PLEK, RFX2 | 624        | 151      | 18082     | 0.959522    | 1          | 1         | 0.97199421 |
| GOTERM_BP_DIRECT      | GO:0042384~cilium assembly              | 3                                     | 0.457317 | 0.93979174 | RFX2, FOX, | 624        | 129      | 18082     | 0.673897    | 1          | 1         | 0.97199421 |
| GOTERM_BP_DIRECT      | GO:0060271~cilium morphogenesis         | 3                                     | 0.457317 | 0.9821426  | RFX2, FOX, | 624        | 170      | 18082     | 0.511369    | 1          | 1         | 0.9821426  |



SUPPLEMENTAL TABLE S2

Centrimo motif enrichment analysis using the HOCOMOCO database and 2174 gene promoter associated regions with increased chromatin accessibility after pDC activation

| db_index | motif_id              | motif_alt | consensus | E-value  | adj_p-value | log_adj_p | bin_location | bin_width | total_width | sites_in_bin | total_sites | p_success | p-value | mult_tests |
|----------|-----------------------|-----------|-----------|----------|-------------|-----------|--------------|-----------|-------------|--------------|-------------|-----------|---------|------------|
| 1        | TF65_MOUSE.H11MO.0.A  | KGGRMTT   | 4.50E-55  | 1.30E-57 | -131.02     | 0         | 166          | 490       | 1015        | 1956         | 0.33878     | 5.20E-60  | 244     |            |
| 1        | NFKB2_MOUSE.H11MO.0.C | GGGAAAK'  | 1.10E-53  | 3.00E-56 | -127.84     | 0         | 152          | 490       | 937         | 1924         | 0.3102      | 1.20E-58  | 244     |            |
| 1        | NFKB1_MOUSE.H11MO.0.A | GGGAAAK'  | 2.80E-51  | 7.80E-54 | -122.28     | 0         | 176          | 490       | 989         | 1830         | 0.35918     | 3.20E-56  | 244     |            |
| 1        | FOS_MOUSE.H11MO.0.A   | SDRTGAGT  | 3.20E-45  | 9.00E-48 | -108.32     | 0         | 247          | 489       | 699         | 941          | 0.50511     | 3.70E-50  | 244     |            |
| 1        | FOSL1_MOUSE.H11MO.0.A | KRVTGAGT  | 1.70E-38  | 4.70E-41 | -92.85      | 0         | 261          | 489       | 859         | 1177         | 0.53374     | 1.90E-43  | 244     |            |
| 1        | FOSL2_MOUSE.H11MO.0.A | KVTGAGTC  | 5.30E-32  | 1.50E-34 | -77.9       | 0         | 162          | 490       | 767         | 1582         | 0.33061     | 6.10E-37  | 244     |            |
| 1        | RELB_MOUSE.H11MO.0.C  | RGGGRMT   | 6.00E-32  | 1.70E-34 | -77.77      | 0         | 177          | 489       | 1010        | 2020         | 0.36196     | 6.90E-37  | 244     |            |
| 1        | REL_MOUSE.H11MO.0.A   | DRWRGGC   | 3.90E-31  | 1.10E-33 | -75.91      | 0         | 156          | 486       | 952         | 2106         | 0.32099     | 4.50E-36  | 242     |            |
| 1        | FOSB_MOUSE.H11MO.0.A  | VTGAGTCA  | 6.90E-31  | 1.90E-33 | -75.33      | 0         | 208          | 492       | 1129        | 2012         | 0.42276     | 7.80E-36  | 245     |            |
| 1        | JUND_MOUSE.H11MO.0.A  | GRRTGAGT  | 2.00E-30  | 5.50E-33 | -74.28      | 0         | 260          | 490       | 1127        | 1657         | 0.53061     | 2.30E-35  | 244     |            |
| 1        | JUN_MOUSE.H11MO.0.A   | DVTGAGTC  | 3.70E-29  | 1.00E-31 | -71.34      | 0         | 247          | 491       | 1160        | 1798         | 0.50305     | 4.30E-34  | 245     |            |
| 1        | ATF3_MOUSE.H11MO.0.A  | VTGAGTCA  | 1.10E-27  | 3.10E-30 | -67.93      | 0         | 244          | 492       | 1273        | 2031         | 0.49593     | 1.30E-32  | 245     |            |
| 1        | JUNB_MOUSE.H11MO.0.A  | VTGAGTCA  | 7.20E-25  | 2.00E-27 | -61.47      | 0         | 208          | 492       | 1050        | 1903         | 0.42276     | 8.20E-30  | 245     |            |
| 1        | BACH2_MOUSE.H11MO.0.A | TGCTGAGT  | 3.40E-23  | 9.40E-26 | -57.63      | 0         | 170          | 490       | 855         | 1810         | 0.34694     | 3.80E-28  | 244     |            |
| 1        | SPI1_MOUSE.H11MO.0.A  | VRAAAGA   | 3.00E-20  | 8.40E-23 | -50.83      | 0         | 192          | 486       | 907         | 1753         | 0.39506     | 3.50E-25  | 242     |            |
| 1        | IRF8_MOUSE.H11MO.0.A  | RAAARRGC  | 1.20E-14  | 3.30E-17 | -37.96      | 0         | 227          | 481       | 1025        | 1772         | 0.47193     | 1.40E-19  | 240     |            |
| 1        | RUNX1_MOUSE.H11MO.0.A | BYTGTGG   | 1.30E-14  | 3.60E-17 | -37.85      | 0         | 197          | 489       | 965         | 1912         | 0.40286     | 1.50E-19  | 244     |            |
| 1        | RUNX2_MOUSE.H11MO.0.A | BYCTGTGG  | 1.70E-14  | 4.90E-17 | -37.56      | 0         | 249          | 489       | 1258        | 2071         | 0.5092      | 2.00E-19  | 244     |            |
| 1        | EHF_MOUSE.H11MO.0.B   | VWACSAG   | 3.90E-14  | 1.10E-16 | -36.77      | 0         | 232          | 486       | 940         | 1599         | 0.47737     | 4.50E-19  | 242     |            |
| 1        | IRF1_MOUSE.H11MO.0.A  | RRAANWG   | 1.10E-13  | 3.10E-16 | -35.7       | 0         | 187          | 481       | 718         | 1428         | 0.38877     | 1.30E-18  | 240     |            |
| 1        | BATF_MOUSE.H11MO.0.A  | DSTYYRA'  | 4.10E-13  | 1.10E-15 | -34.4       | 0         | 189          | 483       | 965         | 1984         | 0.3913      | 4.80E-18  | 241     |            |
| 1        | NFE2_MOUSE.H11MO.0.A  | ATGACTCA  | 5.80E-13  | 1.60E-15 | -34.06      | 0         | 121          | 487       | 386         | 1048         | 0.24846     | 6.60E-18  | 243     |            |
| 1        | SPIB_MOUSE.H11MO.0.A  | RAAAGAG   | 6.00E-12  | 1.70E-14 | -31.72      | 0         | 190          | 484       | 591         | 1151         | 0.39256     | 7.00E-17  | 241     |            |
| 1        | CREB1_MOUSE.H11MO.0.A | NRRTGACC  | 1.20E-11  | 3.30E-14 | -31.04      | 0         | 134          | 490       | 629         | 1727         | 0.27347     | 1.40E-16  | 244     |            |
| 1        | IRF2_MOUSE.H11MO.0.B  | RAAAVHG   | 3.20E-11  | 8.90E-14 | -30.05      | 0         | 147          | 481       | 569         | 1395         | 0.30561     | 3.70E-16  | 240     |            |
| 1        | RUNX3_MOUSE.H11MO.0.A | KKCTGTGG  | 2.50E-10  | 6.90E-13 | -28         | 0         | 229          | 489       | 1086        | 1949         | 0.4683      | 2.80E-15  | 244     |            |
| 1        | ELF1_MOUSE.H11MO.0.A  | SRACCCGC  | 7.20E-10  | 2.00E-12 | -26.94      | 0         | 231          | 487       | 809         | 1401         | 0.47433     | 8.20E-15  | 243     |            |
| 1        | NF2L1_MOUSE.H11MO.0.C | HGTCATN   | 7.30E-10  | 2.10E-12 | -26.91      | 0         | 174          | 494       | 922         | 2128         | 0.35223     | 8.30E-15  | 246     |            |
| 1        | IRF4_MOUSE.H11MO.0.A  | RAAARRGC  | 1.50E-09  | 4.20E-12 | -26.2       | 0         | 195          | 483       | 1002        | 2058         | 0.40373     | 1.70E-14  | 241     |            |
| 1        | ELF3_MOUSE.H11MO.0.B  | RAABVAG   | 4.30E-09  | 1.20E-11 | -25.15      | 0         | 203          | 487       | 950         | 1892         | 0.41684     | 4.90E-14  | 243     |            |
| 1        | ETV4_MOUSE.H11MO.0.B  | SAGGAAG'  | 2.40E-08  | 6.80E-11 | -23.42      | 0         | 219          | 493       | 1133        | 2171         | 0.44422     | 2.70E-13  | 246     |            |
| 1        | PRDM1_MOUSE.H11MO.0.A | RAAAGTG   | 2.60E-08  | 7.40E-11 | -23.33      | 0         | 127          | 487       | 677         | 2032         | 0.26078     | 3.00E-13  | 243     |            |
| 1        | NF2L2_MOUSE.H11MO.0.A | RTGACTCA  | 7.30E-08  | 2.00E-10 | -22.32      | 0         | 119          | 487       | 643         | 2050         | 0.24435     | 8.30E-13  | 243     |            |
| 1        | IRF9_MOUSE.H11MO.0.C  | GAAAGCG   | 7.40E-08  | 2.10E-10 | -22.3       | 0         | 197          | 489       | 457         | 875          | 0.40286     | 8.50E-13  | 244     |            |
| 1        | GABPA_MOUSE.H11MO.0.A | GGVRCCGC  | 3.20E-07  | 8.80E-10 | -20.85      | 0         | 233          | 487       | 893         | 1580         | 0.47844     | 3.60E-12  | 243     |            |
| 1        | ELF2_MOUSE.H11MO.0.C  | TDNCAGG   | 4.40E-06  | 1.20E-08 | -18.22      | 0         | 226          | 486       | 815         | 1483         | 0.46502     | 5.10E-11  | 242     |            |
| 1        | PEBB_MOUSE.H11MO.0.C  | TYTGTGGT  | 7.10E-06  | 2.00E-08 | -17.73      | 0         | 194          | 490       | 960         | 2062         | 0.39592     | 8.10E-11  | 244     |            |
| 1        | STAT2_MOUSE.H11MO.0.A | RRGAAAI   | 2.80E-05  | 7.70E-08 | -16.38      | 0         | 140          | 482       | 611         | 1696         | 0.29046     | 3.20E-10  | 240     |            |
| 1        | ATF1_MOUSE.H11MO.0.B  | VTGACGTC  | 4.50E-05  | 1.30E-07 | -15.89      | 0         | 217          | 491       | 498         | 916          | 0.44196     | 5.10E-10  | 245     |            |
| 1        | ELK1_MOUSE.H11MO.0.B  | RCCGGAAC  | 1.70E-04  | 4.80E-07 | -14.54      | 0         | 238          | 490       | 986         | 1773         | 0.48571     | 2.00E-09  | 244     |            |
| 1        | FLI1_MOUSE.H11MO.0.A  | GGVRCCGC  | 1.90E-04  | 5.30E-07 | -14.45      | 0         | 179          | 487       | 828         | 1910         | 0.36756     | 2.20E-09  | 243     |            |
| 1        | PO2F2_MOUSE.H11MO.0.B | AYATGCAA  | 2.40E-04  | 6.60E-07 | -14.23      | 0         | 198          | 490       | 883         | 1875         | 0.40408     | 2.70E-09  | 244     |            |
| 1        | ETV6_MOUSE.H11MO.0.C  | RCAGGAAI  | 2.80E-04  | 7.90E-07 | -14.05      | 0         | 234          | 492       | 1165        | 2165         | 0.47561     | 3.20E-09  | 245     |            |
| 1        | ETS1_MOUSE.H11MO.0.A  | VRRRCMG   | 4.00E-04  | 1.10E-06 | -13.71      | 0         | 231          | 487       | 1071        | 1986         | 0.47433     | 4.60E-09  | 243     |            |
| 1        | ATF2_MOUSE.H11MO.0.A  | RRTGABGT  | 4.00E-04  | 1.10E-06 | -13.71      | 0         | 118          | 490       | 545         | 1815         | 0.24082     | 4.60E-09  | 244     |            |
| 1        | NFIL3_MOUSE.H11MO.0.C | DRTTATGY  | 5.70E-04  | 1.60E-06 | -13.35      | 0         | 200          | 490       | 776         | 1623         | 0.40816     | 6.50E-09  | 244     |            |
| 1        | DDIT3_MOUSE.H11MO.0.C | MTGATGH   | 7.20E-04  | 2.00E-06 | -13.12      | 0         | 259          | 491       | 1033        | 1735         | 0.52749     | 8.20E-09  | 245     |            |
| 1        | BACH1_MOUSE.H11MO.0.C | TGCTGAGT  | 7.50E-04  | 2.10E-06 | -13.08      | 0         | 167          | 487       | 166         | 336          | 0.34292     | 8.60E-09  | 243     |            |
| 1        | ETV2_MOUSE.H11MO.0.A  | RRARRCAC  | 1.40E-03  | 3.90E-06 | -12.46      | 0         | 231          | 485       | 918         | 1687         | 0.47629     | 1.60E-08  | 242     |            |

|                         |          |          |          |        |   |     |     |      |      |         |          |     |
|-------------------------|----------|----------|----------|--------|---|-----|-----|------|------|---------|----------|-----|
| 1 IRF7_MOUSE.H11MO.0.C  | GAAASYGA | 1.50E-03 | 4.20E-06 | -12.38 | 0 | 129 | 491 | 649  | 2044 | 0.26273 | 1.70E-08 | 245 |
| 1 ERG_MOUSE.H11MO.0.A   | VVRCMGG  | 9.20E-03 | 2.60E-05 | -10.57 | 0 | 175 | 487 | 844  | 2032 | 0.35934 | 1.10E-07 | 243 |
| 1 FEV_MOUSE.H11MO.0.B   | GCVGGAAI | 1.30E-02 | 3.70E-05 | -10.2  | 0 | 207 | 491 | 1036 | 2174 | 0.42159 | 1.50E-07 | 245 |
| 1 CEBPG_MOUSE.H11MO.0.B | RKMTGATC | 1.50E-02 | 4.30E-05 | -10.05 | 0 | 77  | 489 | 226  | 1036 | 0.15746 | 1.80E-07 | 244 |
| 1 GFI1B_MOUSE.H11MO.0.A | KCWGTGR  | 8.10E-02 | 2.30E-04 | -8.4   | 0 | 195 | 491 | 946  | 2110 | 0.39715 | 9.20E-07 | 245 |
| 1 ATF4_MOUSE.H11MO.0.A  | RNMTGAT  | 9.00E-02 | 2.50E-04 | -8.29  | 0 | 77  | 489 | 127  | 535  | 0.15746 | 1.00E-06 | 244 |
| 1 BATF3_MOUSE.H11MO.0.A | BRSTTCAI | 1.20E-01 | 3.30E-04 | -8     | 0 | 134 | 484 | 651  | 2006 | 0.27686 | 1.40E-06 | 241 |
| 1 NFAC3_MOUSE.H11MO.0.B | TGGAAAAI | 1.60E-01 | 4.40E-04 | -7.73  | 0 | 222 | 492 | 1003 | 1992 | 0.45122 | 1.80E-06 | 245 |
| 1 ELK4_MOUSE.H11MO.0.B  | SRRCCGGA | 4.80E-01 | 1.30E-03 | -6.61  | 0 | 232 | 488 | 1105 | 2111 | 0.47541 | 5.60E-06 | 243 |
| 1 IRF3_MOUSE.H11MO.0.A  | RAAARGGJ | 7.20E-01 | 2.00E-03 | -6.21  | 0 | 145 | 481 | 713  | 2062 | 0.30146 | 8.40E-06 | 240 |
| 1 NFAC2_MOUSE.H11MO.0.C | TGGAAAAI | 7.90E-01 | 2.20E-03 | -6.11  | 0 | 56  | 492 | 302  | 2084 | 0.11382 | 9.10E-06 | 245 |
| 1 RORG_MOUSE.H11MO.0.B  | RRAASTRG | 8.30E-01 | 2.30E-03 | -6.06  | 0 | 131 | 489 | 628  | 2020 | 0.26789 | 9.60E-06 | 244 |
| 1 KLF1_MOUSE.H11MO.0.A  | DGGGYGKI | 8.70E-01 | 2.40E-03 | -6.02  | 0 | 213 | 487 | 788  | 1605 | 0.43737 | 1.00E-05 | 243 |
| 1 MITF_MOUSE.H11MO.0.A  | YCWYGTGJ | 1.10E+00 | 3.20E-03 | -5.75  | 0 | 169 | 491 | 793  | 2039 | 0.3442  | 1.30E-05 | 245 |
| 1 SIX4_MOUSE.H11MO.0.C  | WGWAACI  | 1.30E+00 | 3.60E-03 | -5.63  | 0 | 203 | 487 | 1003 | 2173 | 0.41684 | 1.50E-05 | 243 |
| 1 MAFK_MOUSE.H11MO.0.A  | DWWWYTI  | 1.50E+00 | 4.30E-03 | -5.44  | 0 | 217 | 481 | 387  | 733  | 0.45114 | 1.80E-05 | 240 |
| 1 TBX21_MOUSE.H11MO.0.A | RRAGGTGJ | 1.60E+00 | 4.50E-03 | -5.4   | 0 | 179 | 489 | 890  | 2174 | 0.36605 | 1.80E-05 | 244 |
| 1 STAT1_MOUSE.H11MO.0.A | RRRAAAHI | 1.90E+00 | 5.40E-03 | -5.21  | 0 | 167 | 479 | 808  | 2060 | 0.34864 | 2.30E-05 | 239 |
| 1 NR1D2_MOUSE.H11MO.0.A | RRRDAAWG | 2.10E+00 | 5.90E-03 | -5.13  | 0 | 156 | 482 | 783  | 2144 | 0.32365 | 2.50E-05 | 240 |
| 1 CREM_MOUSE.H11MO.0.C  | CRVTGACC | 3.10E+00 | 8.70E-03 | -4.75  | 0 | 182 | 490 | 548  | 1288 | 0.37143 | 3.60E-05 | 244 |
| 1 KLF4_MOUSE.H11MO.0.A  | KRRRVWVG | 3.80E+00 | 1.10E-02 | -4.56  | 0 | 216 | 486 | 1018 | 2088 | 0.44444 | 4.40E-05 | 242 |
| 1 CEBPA_MOUSE.H11MO.0.A | DRTTGTGC | 3.80E+00 | 1.10E-02 | -4.54  | 0 | 298 | 490 | 992  | 1509 | 0.60816 | 4.40E-05 | 244 |
| 1 MAF_MOUSE.H11MO.0.A   | RWWBTGC  | 4.20E+00 | 1.20E-02 | -4.45  | 0 | 216 | 484 | 986  | 2012 | 0.44628 | 4.90E-05 | 241 |
| 1 SUH_MOUSE.H11MO.0.A   | BYSTGGGA | 4.90E+00 | 1.40E-02 | -4.3   | 0 | 96  | 490 | 498  | 2168 | 0.19592 | 5.60E-05 | 244 |
| 1 E2F2_MOUSE.H11MO.0.B  | GGCGCGA  | 5.80E+00 | 1.60E-02 | -4.13  | 0 | 169 | 491 | 359  | 883  | 0.3442  | 6.60E-05 | 245 |
| 1 CEBPB_MOUSE.H11MO.0.A | DRTTGYGC | 6.10E+00 | 1.70E-02 | -4.07  | 0 | 266 | 490 | 801  | 1346 | 0.54286 | 7.10E-05 | 244 |

# CentriMo (Local Motif Enrichment Analysis): Version 5.3.3 compiled on Feb 21 2021 at 14:52:25

# The format of this file is described at <https://meme-suite.org/meme/doc/centrimo-output-format.html>.

# centrimo --oc . --verbosity 1 --dfile description --score 5.0 --ethresh 10.0 --bfile new\_sequences.fasta.bg new\_sequences.fasta db/MOUSE/HOCOMOCov11\_core\_MOUSE\_mono\_meme\_format.meme
